# Supplementary material for: A population-based survival analysis describing the association of body mass index on time to revision for total hip and knee replacements: results from the UK general practice research database
Source: PubMed Central journal article supplement — BMJ Open. 2013 Nov 27;3(11):e003614. doi: 10.1136/bmjopen-2013-003614 (PMC3845068; doi:10.1136/bmjopen-2013-003614), 2013-11-27
Supplement: bmjopen-2013-003614.draft_revisions.pdf [file bmjopen-2013-003614.draft_revisions.pdf]

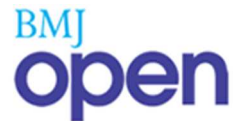

**A population-based survival analysis describing the association of body mass index on time to revision for total hip and knee replacements: Results from the UK General Practice Research Database**

|                                 |                                                                                                                                                                                                                                                                                                                                                                                                                                                                 |
|---------------------------------|-----------------------------------------------------------------------------------------------------------------------------------------------------------------------------------------------------------------------------------------------------------------------------------------------------------------------------------------------------------------------------------------------------------------------------------------------------------------|
| Journal:                        | <i>BMJ Open</i>                                                                                                                                                                                                                                                                                                                                                                                                                                                 |
| Manuscript ID:                  | bmjopen-2013-003614                                                                                                                                                                                                                                                                                                                                                                                                                                             |
| Article Type:                   | Research                                                                                                                                                                                                                                                                                                                                                                                                                                                        |
| Date Submitted by the Author:   | 26-Jul-2013                                                                                                                                                                                                                                                                                                                                                                                                                                                     |
| Complete List of Authors:       | Culliford, David; University of Southampton, Faculty of Medicine<br>Maskell, Joe; University of Southampton, Public Health Sciences and Medical Statistics<br>Judge, Andrew; University of Oxford, NIHR Musculoskeletal Biomedical Research Unit; University of Southampton, MRC Lifecourse Epidemiology Unit<br>Arden, Nigel; University of Oxford, NIHR Musculoskeletal Biomedical Research Unit; University of Southampton, MRC Lifecourse Epidemiology Unit |
| <b>Primary Subject Heading</b>: | Epidemiology                                                                                                                                                                                                                                                                                                                                                                                                                                                    |
| Secondary Subject Heading:      | Surgery                                                                                                                                                                                                                                                                                                                                                                                                                                                         |
| Keywords:                       | Adult orthopaedics < ORTHOPAEDIC & TRAUMA SURGERY, Hip < ORTHOPAEDIC & TRAUMA SURGERY, Knee < ORTHOPAEDIC & TRAUMA SURGERY                                                                                                                                                                                                                                                                                                                                      |
|                                 |                                                                                                                                                                                                                                                                                                                                                                                                                                                                 |

SCHOLARONE™  
Manuscripts

1  
2  
3 **A POPULATION-BASED SURVIVAL ANALYSIS DESCRIBING THE ASSOCIATION OF BODY**  
4 **MASS INDEX ON TIME TO REVISION FOR TOTAL HIP AND KNEE REPLACEMENTS:**  
5 **RESULTS FROM THE UK GENERAL PRACTICE RESEARCH DATABASE.**  
6  
7  
8  
9

10  
11 **STUDY DESIGN:** Population-based study.  
12

13  
14  
15 **AUTHORS' NAMES AND AFFILIATIONS**  
16

17 David Culliford (Senior Medical Statistician)<sup>1</sup>  
18

19 Joe Maskell (Data Manager)<sup>2</sup>  
20

21 Andy Judge (Senior Medical Statistician)<sup>3,4</sup>  
22

23 Nigel K Arden (Professor of Rheumatic Diseases and Director)<sup>3,4</sup>  
24

25 and the COAST Study group  
26  
27

28 <sup>1</sup>Faculty of Medicine, University of Southampton, Tremona Road, Southampton. SO16 6YD.  
29

30 <sup>2</sup>Public Health Sciences and Medical Statistics, Faculty of Medicine, University of  
31 Southampton, Tremona Road, Southampton, SO16 6YD.  
32

33 <sup>3</sup>NIHR Musculoskeletal Biomedical Research Unit, University of Oxford, Nuffield  
34 Orthopaedic Centre, Windmill Road, Oxford, OX3 7LD.  
35

36 <sup>4</sup>MRC Lifecourse Epidemiology Unit, University of Southampton, Southampton General  
37 Hospital, SO16 6YB.  
38  
39  
40  
41  
42  
43  
44  
45  
46  
47  
48  
49  
50  
51  
52  
53  
54  
55  
56  
57  
58  
59  
60

2

**ABSTRACT**

**Objectives** Against a backdrop of rising levels of obesity, we describe and estimate associations of body mass index (BMI), age and gender with time to revision for subjects undergoing primary total hip (THR) or knee (TKR) replacement in the UK.

**Design** Population-based cohort study

**Setting** Routinely collected primary care data from a representative sample of general practices, including linked data on all secondary care events.

**Participants** Population-based cohort study of **63,162** THR and **54,276** TKR patients in the UK General Practice Research Database between 1988 and 2011.

**Primary and secondary outcomes** Risk of THR and TKR revision associated with BMI, age and gender, after adjusting for the competing risk of death.

**Results** The five-year cumulative incidence rate for THR was 2.2% for men and 1.8% for women (TKR: 2.3% for men, 1.6% for women). The estimated adjusted subhazard ratios for THR patients undergoing subsequent hip revision surgery, with a competing risk of death, were 1.020 (95% CI: 1.009, 1.032) per additional unit (kg/m<sup>2</sup>) of BMI, 1.23 (95% CI: 1.10, 1.38) for men compared with women and 0.970 (95% CI: 0.967, 0.973) per additional year of age. For TKR patients, the equivalent estimates were 1.015 (95% CI: 1.002, 1.028) for BMI; 1.51 (95% CI: 1.32, 1.73) for gender, and 0.957 (95% CI: 0.951, 0.962) for age. Morbidly obese THR patients had a 65.5% increase (95% CI: 15.4%, 137.3%, p=0.006) in the subhazard of revision versus the normal BMI group (18.5 to 25). The effect for TKR was smaller (a 43.9% increase) and weaker (95% CI: 2.6%, 103.9%, p=0.040).

1  
2  
3  
4  
5 **Conclusions** Body mass index is estimated to have a small but significant association with  
6  
7 the risk of hip and knee revision, but absolute numbers are small. Further studies are  
8  
9 needed in order to distinguish between effects for specific revision surgery indications.  
10

#### 11 12 13 14 15 16 17 18 19 **WHAT IS ALREADY KNOWN ON THIS TOPIC**

20  
21 Published revision rates for hip and knee replacement already exist, based on UK-based  
22  
23 registry data, but follow-up periods are still relatively short.  
24

25  
26 Some evidence exists that obesity is a risk factor for undergoing primary total hip and knee  
27  
28 replacements, but there is little in the literature for the risks of raised BMI on revision  
29  
30 surgery.  
31

32  
33 The recording of BMI prior to primary total hip or knee replacement is less than complete  
34  
35 in most national joint registries.  
36  
37

#### 38 39 **WHAT THIS STUDY ADDS**

40  
41 Body mass index is estimated to have a small positive association with the risk of hip and  
42  
43 knee revision, after allowing for the competing risk of death.  
44

45  
46 The elevated risk of revision of the hip in morbidly obese (> 40 kg/m<sup>2</sup>) patients during the  
47  
48 first year after primary replacement is not observed in the knee.

49  
50 It would take 175 TKR patients (152 for THR) to reduce their baseline BMI from obese to  
51  
52 normal in order to prevent one revision operation after 5 years.  
53  
54  
55  
56  
57  
58  
59  
60

### Article focus

- Total joint replacement of the hip (THR) or knee (TKR) is commonly used as an intervention for patients with end-stage osteoarthritis of the lower limb.
- Joint prostheses sometimes require revision surgery and it is important for surgeons, patients and policy makers to understand the risk factors for time to revision.
- Although many studies modelling the time to joint revision have taken over the past 30 years, few such studies have been large-scale, population-based, competing risks analyses.

### Key messages

- These data from the GPRD shows a small but significant association between body mass index and the time to revision for both hip and knee replacement.
- The risk of hip replacement revision for morbidly obese patients was two-thirds higher than for those with normal body mass index.
- The use of competing risks methods produced similar estimates of revision risk to those obtained using relative risks regression methods.

### Strengths and potential limitations of the study

- The large sample size of the GPRD (over 5% of the UK general practice population) enables population-level inferences to be made
- The statistical methods explicitly account for the competing risk of death which has a much higher event rate than the event of interest (THR or TKR) in this patient group.
- GPRD data does not have directly linked information detailing the reasons for being referred for surgery, so we were unable to establish an exact indication.

## INTRODUCTION

Total joint replacement of the hip and knee are well established as interventions for those suffering with end-stage osteoarthritis (OA) of the lower limb, with OA being the most frequent indication for total hip or knee replacement in the UK(1) (over 90% for hips and over 95% for knees). Yet hip and knee prostheses do not necessarily continue to function effectively for the lifetime of the patient(1, 2). Many traditional metal-on-polyethylene implants are likely to require revision surgery due to wear after 20 years of use due to wear characteristics and peri-prosthetic loosening. As a consequence, elective THR and TKR procedures have until relatively recently been indicated mainly in older patients, but even prostheses which make use of the latest technological developments (*e.g.* unicompartmental knee prostheses) are not yet routinely recommended for use in younger patients.

A further dimension is added by the increasing prevalence of obesity in western populations, with clinicians in some cases considering patients too obese to undergo surgery(3, 4), partly due to the perceived increase in risk of both peri- and post-operative complications. There have also been examples of obese and/or morbidly obese patients experiencing restricted access to hip replacement surgery in some parts of the UK(5-7) where local healthcare planners have had similar concerns.

Revision procedures involve a surgical intervention to correct a prosthesis which is not functioning properly. Such operations are more costly than the original replacement procedure(8, 9). Population-based estimates of the time from primary surgery to a revision procedure are of importance to orthopaedic surgeons, rheumatologists, healthcare providers, policymakers and patients. Registry data, both in the U.K.(1) and internationally(10, 11), have been used extensively to estimate time to revision(12). Such data has been used previously to model prosthesis survival time in order to assess which

6

specific demographic, clinical and prosthesis-specific factors are associated with time to failure(13, 14).

Over the 12 months to April 2011, there were over 178,000 total hip and knee replacement operations recorded in the National Joint Registry for England and Wales(1). However, although the registry contains complete data on many variables, including age and gender, body mass index is recorded in approximately 61% of subjects undergoing hip replacement (62% for knee).

The primary aim of this study was to use data from the General Practice Research Database to produce population-based estimates for the association of body mass index, age and gender with the time to revision surgery in the long term following a THR or TKR.

## **METHOD**

### **Participants**

We used data from the General Practice Research Database (GPRD). The GPRD comprises the entire computerized medical records of a sample of patients attending general practitioners (GPs) in the UK covering a population of 6.5 million patients from over 600 contributing practices chosen to be representative of the wider UK population(15). GPs in the UK play a key role in the delivery of healthcare by providing primary care and referral to specialist hospital services. Patients are registered with one practice that stores medical information from primary care and hospital attendances. The GPRD has recently become part of the new Clinical Practice Research Datalink (CPRD) which is administered by the Medicines and Healthcare products Regulatory Agency (MHRA).

1  
2  
3 The GPRD records contain all clinical and referral events in both primary and secondary  
4 care in addition to comprehensive demographic information, prescription data, and  
5 hospital admissions. Data is stored using Read codes for diseases that are cross-referenced  
6 to the International Classification of Diseases (ICD-9). Read codes are used as the standard  
7 clinical terminology system within UK primary care. Only practices that pass quality  
8 control are used as part of the GPRD database. Deleting or encoding personal and clinic  
9 identifiers ensures the confidentiality of information in the GPRD. The GPRD comprises  
10 entire general practice populations rather than probability-based samples of patients.  
11  
12  
13  
14  
15  
16  
17  
18  
19  
20

21 We identified all patients in the database with a diagnosis code for total hip or knee  
22 arthroplasty from the beginning of 1991 until August 2011. We then identified any  
23 secondary (revision) hip or knee operations for these patients which occurred subsequent  
24 to the primary operation. Deaths recorded within the GPRD were also identified. The date  
25 of the first incidence of a subject's hip or knee replacement was used as the start time. The  
26 event of interest in all time-to-event models was the first recorded revision operation.  
27 Censoring events were the end of study date (11<sup>th</sup> August 2011) or the transfer of a patient  
28 out of the GPRD for any reason other than death. Death from any cause was treated as a  
29 competing risk in the primary analysis. Patients were included in the analysis if aged 18  
30 years or over at the time of the replacement operation. Participant demographics including  
31 age, gender, body mass index (BMI), smoking and drinking status were collated, in addition  
32 to information on comorbid conditions.  
33  
34  
35  
36  
37  
38  
39  
40  
41  
42  
43  
44  
45  
46  
47  
48

### 49 **Analysis**

50 We used the competing risks regression methods of Fine and Gray(16) to estimate the  
51 effects of a subject's body mass index (BMI), age and gender on the time to revision of a  
52 prosthesis implanted during a THR or TKR operation. The substantive event of interest was  
53 the first incidence of revision surgery, with all-cause mortality separately identified as a  
54  
55  
56  
57  
58  
59  
60



8

1  
2  
3 competing risk. The rationale for using competing risks regression is that methods which  
4 treat death as just another censoring event may overestimate risk for an event of interest,  
5 especially in an older population(17). We adjusted for a range of important covariates and  
6 potential confounders: smoking status, alcohol consumption and the number of comorbid  
7 conditions (which include diabetes, hypertension, stroke, cardiovascular disease and  
8 anaemia). All covariates were treated as fixed at baseline. Analyses for hips and knees were  
9 performed separately, with prosthesis survival at the end of follow-up being of primary  
10 interest. Proportionality of hazards assumptions was assessed by examining  
11 complementary log-log plots of the cumulative incidence. As a sensitivity analysis we  
12 modelled the same data using standard methods which do not cater for competing risks  
13 (*i.e.* Cox regression analysis with death as a censoring event). We also calculated stand-  
14 alone estimates for the cumulative incidence of revision surgery at 1, 5, 10 and 15 years,  
15 and plotted estimates of the age-, gender- and BMI-specific cumulative incidence curves for  
16 the whole cohort.  
17  
18  
19  
20  
21  
22  
23  
24  
25  
26  
27  
28  
29  
30  
31  
32  
33

34 All tests of significance were at the 5% level and two-sided. Interval estimates were based  
35 on 95% confidence intervals. The main statistical analysis was carried out using R (R Core  
36 Team, 2012. R Foundation for Statistical Computing, Vienna, Austria), SAS version 9.2 (SAS  
37 Institute Inc., Cary, NC) and Stata (StataCorp. 2011. Stata Statistical Software: Release 12.  
38 College Station, TX).  
39  
40  
41  
42  
43  
44  
45  
46

## 47 **RESULTS**

### 48 **Participant demographics**

49  
50  
51 Over the study period the database contained 63,162 patients undergoing total hip  
52 replacement and 54,276 patients undergoing total knee replacement. The average age at  
53 replacement was similar in both the THR and the TKR groups but the proportion of women  
54  
55  
56  
57  
58  
59  
60

1  
2  
3 was greater for both THR and TKR (table 1). For those with a recorded pre-operative BMI,  
4 the proportion of obese subjects (BMI  $\geq 30$  kg/m<sup>2</sup>) was 26.2% for THR and 39.8% for TKR  
5 and the proportion of morbidly obese subjects (which we define as having a BMI  $\geq 40$   
6 kg/m<sup>2</sup>) was 1.6% for THR and 3.6% for TKR. Table 1 describes the baseline characteristics  
7 of the cohort, including summary statistics and missing data percentages for all explanatory  
8 variables where complete data was not observed.  
9  
10  
11  
12  
13  
14

### 15 16 17 18 **Survival analysis**

19  
20  
21 The estimated cumulative incidence of revision at five years was 2.0% (95% CI: 1.8, 2.1) for  
22 THR and 1.9% (95% CI: 1.8, 2.1) for TKR. For women, cumulative incidence at five years  
23 was 1.8% (95% CI: 1.7, 2.0) for THR and 1.6% (95% CI: 1.5, 1.8) for TKR, and for men 2.2%  
24 (95% CI: 2.0, 2.4) and 2.3% (95% CI: 2.1, 2.6) respectively. Table 2 provides gender-  
25 specific estimates of cumulative incidence with point-wise confidence intervals for a range  
26 of times (1, 3, 5, 10 and 15 years after THR/TKR). Figures 1 and 2 provide a further  
27 breakdown of the cumulative incidence of revision for the whole THR and TKR cohorts  
28 respectively, with separate incidence curves for categorised BMI (figure 1) and categorised  
29 age (figure 2). Gray's test was used to examine whether there were overall differences in  
30 the cumulative incidence of revision by gender, categorised age (<55, 55-64, 65-74, 75-84,  
31 >85 years) and categorised BMI (<18.5, 18.5-24.9, 25-29.9, 30-39.9, >40 kg/m<sup>2</sup>). All three  
32 variables showed statistically significant differences in cumulative incidence for both hip  
33 (Gray's test statistic: gender, age, BMI,  $p < 0.001$  for all) and knee (Gray's test statistic:  
34 gender, age, BMI,  $p < 0.001$  for all).  
35  
36  
37  
38  
39  
40  
41  
42  
43  
44  
45  
46  
47  
48  
49  
50  
51  
52

53 In a single predictor (univariable) survival model allowing for the competing risk of death,  
54 we found that the subhazard of revision was significantly greater for men compared to  
55 women for both THR (subhazard ratio [SHR]: 1.35, 95% CI: 1.23, 1.48,  $p < 0.001$ ) and TKR  
56  
57  
58  
59  
60

10

1  
2  
3 2.0% (SHR: 1.54, 95% CI: 1.37, 1.72,  $p < 0.001$ ). Age at total joint replacement was also a  
4  
5 significant predictor of revision for both hip and knee, with THR subjects estimated to have  
6  
7 a 3% reduction in the subhazard of revision (SHR: 0.970, 95% CI: 0.967, 0.973,  $p < 0.001$ ) for  
8  
9 each extra year of age, with TKR subjects showing a 4.3% reduction (SHR: 0.957, 95% CI:  
10  
11 0.952, 0.961,  $p < 0.001$ ). The univariable model for body mass index estimated that THR  
12  
13 subjects had a 3.0% increase in the subhazard of revision (SHR: 1.030, 95% CI: 1.020,  
14  
15 1.041,  $p < 0.001$ ) for each extra unit ( $\text{kg}/\text{m}^2$ ) of BMI, with TKR subjects showing a 2.6%  
16  
17 increase per unit (SHR: 1.026, 95% CI: 1.013, 1.038,  $p < 0.001$ ).  
18  
19

20  
21 The effects for all three variables (gender, age and BMI) were then estimated in  
22  
23 multivariable competing risks regression models after adjusting for smoking status,  
24  
25 drinking status and the number of comorbid conditions. For age, the estimates for the  
26  
27 subhazard of revision were almost exactly the same as those from the univariable model for  
28  
29 both hip and knee, but for gender (SHR: 1.23 for hip; 1.51 for knee) and BMI (SHR: 1.020  
30  
31 for hip; 1.015 for knee) the estimates were smaller. Nevertheless, all three variables  
32  
33 remained statistically significant for both hip and knee in the presence of adjustment.  
34  
35 Testing for two-way interactions between age, gender and BMI did not produce any  
36  
37 significant effects. All subhazard estimates (with 95% confidence intervals and p-values)  
38  
39 from the univariable and multivariable models are given in table 3.  
40  
41  
42  
43

44 To further explore the effect estimates for BMI we ran the same adjusted age-gender-BMI  
45  
46 model described above, but used categorical BMI instead of continuous. For morbidly obese  
47  
48 TKR subjects (BMI 40+) there was a 43.9% increase (95% CI: 2.6%, 103.9%,  $p = 0.040$ ) in  
49  
50 the subhazard of revision compared to those with a normal BMI (18.5 to 25), but the effect  
51  
52 for THR was larger (a 65.5% increase) and stronger (95% CI: 15.4%, 137.3%,  $p = 0.006$ ).  
53  
54 The effect sizes were similar to those obtained when using the adjusted subhazard ratio  
55  
56 estimate of continuous BMI for a subject with a BMI of 45 relative to one with a BMI of 22  
57  
58  
59  
60

1  
2  
3 (increase of 57.7% for THR; 40.8% for TKR). For obese patients in the range 30 to 40 kg/m<sup>2</sup>  
4  
5 versus those with a normal BMI, the estimated subhazard ratio for revision was weakly  
6  
7 significant for THR (15.7% increase, 95% CI: 0.2%, 33.7%, p=0.048) but not for TKR  
8  
9 (17.9% increase, 95% CI: -1.9%, 41.6%, p=0.079).  
10

11  
12  
13 As a sensitivity analysis, we also performed standard Cox regressions with revision surgery  
14  
15 as the event of interest and where no distinction was made between death and other  
16  
17 censoring events. Univariable models for age, gender and BMI gave very similar results to  
18  
19 the competing risks analysis, as did the multivariable models which adjusted for the same  
20  
21 factors as in the competing risks regression. Results from the Cox regression models are  
22  
23 given in table 4.  
24

25  
26  
27  
28 Finally, we assessed whether the higher incidence of hip revision surgery during the first  
29  
30 year following THR (see figures 1a and 2a) might compromise the proportionality  
31  
32 assumption and therefore suggest the inclusion of time-dependent effects. Separate  
33  
34 univariable piecewise competing risks models for hip revision were fitted for gender, age  
35  
36 ( $\leq 65$  years vs.  $> 65$ ) and BMI ( $> 40$  vs.  $\leq 40$ ). A single changepoint at one year was used  
37  
38 to simultaneously estimate two subhazard ratios for revision (before and after one year  
39  
40 following THR). The only model which provided some evidence for a different subhazard  
41  
42 ratio during the first year was with BMI ( $> 40$  vs.  $\leq 40$ ) as the predictor (SHR: 2.619, 95%  
43  
44 CI: 1.502, 4.560, p=0.001), but this was not matched with a statistically significant estimate  
45  
46 for revision after the first year (SHR: 0.575, 95% CI: 0.238, 1.170, p=0.130).  
47  
48  
49

## 50 DISCUSSION

51  
52  
53  
54  
55 This study presents population-based estimates for the risk of revision following total joint  
56  
57 replacement of the hip and knee using methods from survival analysis. Cumulative  
58  
59  
60

12

1  
2  
3 incidence rates of revision were higher for men than for women and higher for hips than  
4  
5 knees. Age, gender and body mass index were estimated to be significant predictors of time  
6  
7 to revision in an adjusted model allowing for the competing risk of death. Severely obese  
8  
9 patients undergoing total hip replacement were observed to have a higher risk of revision  
10  
11 surgery during the first year following replacement, but the same effect was not observed  
12  
13 for knee replacement.  
14

15  
16  
17 The literature on obesity as a risk factor for hip and knee arthroplasty concentrates mainly  
18  
19 on the risk for primary replacement rather than for revision procedures, and most use rate  
20  
21 differences to estimate relative risk, rather than using time-to-event methods. Many  
22  
23 published studies are small and do not have sufficient power to detect rare outcomes. Often  
24  
25 these studies are locally based and the generalisability to population level is questionable.  
26  
27 Mostly results are presented for categorised BMI, which is often dichotomised at 30 kg/m<sup>2</sup>,  
28  
29 and where results for the morbidly obese are reported, the sample size is small.  
30  
31

32  
33  
34 One of the largest studies examining primary replacement followed up a cohort of over  
35  
36 490,000 middle-aged women over an average of 2.9 years and found increased incidence of  
37  
38 hip and knee replacement in obese subjects(18). Of the studies which consider the effect of  
39  
40 obesity on outcomes after primary joint replacement, several focus mainly on events such  
41  
42 as complications arising from surgery(19) or subsequent admission to an intensive care  
43  
44 unit(20), rather than the time to revision surgery. Among studies of other non-revision  
45  
46 outcomes, Andrew *et al*(21) looked at the change in Oxford Hip Score five years after THR  
47  
48 and found no difference between non-obese, obese and morbidly obese patients, but in a  
49  
50 smaller study(22) using Harris Hip Score (HHS) with the same length of follow-up, an  
51  
52 increase in BMI was associated with a small but significant reduction in HHS.  
53  
54  
55  
56  
57  
58  
59  
60

1  
2  
3 An editorial on obesity and joint replacement in 2006(23) suggested that it is those with a  
4 BMI of greater than 40 units (rather than 30) who are at risk of worse outcomes, yet  
5 several subsequent studies have used a BMI cut-point of 30 kg/m<sup>2</sup>. A recent Australian  
6 study of 2026 THR and 535 TKR patients found no difference in mid-term survival rates  
7 between the obese (BMI > 30 kg/m<sup>2</sup>) and non-obese(24). Another study from Switzerland  
8 used Cox regression to estimate the risk of revision in 2495 THRs using the same cut-point  
9 for BMI, estimating a non-significant adjusted hazard ratio for revision of 2.2 (95% CI: 0.9  
10 to 5.3) for obese versus non-obese patients(19). However, a recent Canadian study of 3290  
11 THRs did categorise BMI to include a morbidly obese group (BMI > 40 kg/m<sup>2</sup>) and although  
12 the authors found no difference in time to revision between BMI categories in an  
13 unadjusted analysis, there was a marginally significant difference for septic revisions(25).  
14  
15  
16  
17  
18  
19  
20  
21  
22  
23  
24  
25  
26  
27

28 Our results suggest that there may be a 1.5% to 2% rise in the risk of knee and hip revision  
29 respectively for each extra unit of BMI. However, there is some variation in risk across the  
30 entire range of observed BMI values. For hips, there appears to be very little difference in  
31 BMI-related risk between the normal weight and overweight categories. However, figure 1a  
32 shows that for hips there may be a revision rate of approximately 6% for the morbidly  
33 obese after 10 years, against a 3% rate for the normal and overweight. For knees, figure 1b  
34 shows a more even distribution across the BMI categories up to about 7 years after TKR,  
35 but with higher risk for the morbidly obese between 7 and 10 years after TKR.  
36  
37  
38  
39  
40  
41  
42  
43  
44  
45  
46

47 Although recommendations(26, 27) to consider the use of the cumulative incidence  
48 function for analysing prosthesis survival are gaining acceptance(28), the use of competing  
49 risks regression to model associated risk factors is still not widely observed. The  
50 justification for using competing risks methods in our primary analysis is that hip and knee  
51 prostheses are mainly implanted in older patients for whom mortality is a substantial  
52 competing risk which may be several times greater than the risk of revision. What is  
53  
54  
55  
56  
57  
58  
59  
60

14

perhaps surprising is that our results show little difference between the hazard and subhazard ratio estimates from the Cox and the competing risks regression models respectively, although the former has a cause-specific interpretation with no distinction between death and censoring whereas the latter directly models the cumulative incidence of revision.

### **Strengths and potential limitations of the study**

The strengths of the study data more than make up for its limitations. GPRD data has individual date-stamped records of patient event data in primary and secondary care settings, including data on many potential confounders, including comorbidities, BMI, smoking and drinking. The GPRD practice network covers all of the United Kingdom, and approximately 5% of all practices are covered by the GPRD. The high degree of generalisability afforded by this very large sample enables population-level inferences to be made. Follow-up is long, with several hundred prostheses in the dataset having over 20 years of follow-up without being revised. The choice of the statistical methods used to allow for the competing risk of death adds a further degree of robustness to the study. The regression estimates of the hazard ratio for body mass index as a factor associated with revision benefit from a precision which is not usually achievable outside of national registers, especially for the group of morbidly obese patients within which event rates in the literature are low.

There are several limitations to this work. The revision rate estimates hip and knee at 5 years are close to, but slightly less than those reported by the National Joint Registry, but the GPRD data used in this study includes prostheses implanted from the late 1980s. Also our data does not have directly linked information on the indication for surgery, which would have been enabled a sub-analysis by reason for revision.

## CONCLUSION

This study has presented estimates of rates and risk factors for revision surgery on hip and knee prostheses using one of the largest available population-based sets of joint replacement data outside of national arthroplasty registries. Our estimates suggest that body mass index is positively associated with the risk of hip and knee revision, but studies of register data linked with sources of demographic and clinical data are needed in order to distinguish between effects for specific indications for revision surgery.

## Acknowledgements

We gratefully acknowledge all the general practitioners and their patients who have consented to give information to the GPRD along with the MRC support in providing access to the database.



**Author affiliations**

<sup>1</sup>Faculty of Medicine, University of Southampton, Tremona Road, Southampton. SO16 6YD.

<sup>2</sup>Public Health Sciences and Medical Statistics, Faculty of Medicine, University of Southampton, Tremona Road, Southampton, SO16 6YD.

<sup>3</sup>NIHR Musculoskeletal Biomedical Research Unit, University of Oxford, Nuffield Orthopaedic Centre, Windmill Road, Oxford, OX3 7LD.

<sup>4</sup>MRC Lifecourse Epidemiology Unit, University of Southampton, Southampton General Hospital, SO16 6YB.

**Collaborators** The following people are members of the COAST Study group: Cyrus Cooper, Mark Mullee, James Raftery, Andrew Carr, Andrew Price, Kassim Javaid, David Beard, Douglas Altman, Nicholas Clarke, Jeremy Latham, Sion Glyn-Jones and David Barrett.

**Contributors** DJC, JM, AJ and NKA were involved in:

(1) substantial contributions to conception and design, analysis and interpretation of data; (2) drafting the article or revising it critically for important intellectual content and (3) final approval of the version to be published.

**Funding** This article presents independent research commissioned by the National Institute for Health Research (NIHR) under its Programme Grants for Applied Research funding scheme (RP-PG-0407-10064). The views expressed in this article are those of the author(s) and not necessarily those of the NHS, the NIHR or the Department of Health. Support was also received from the Oxford NIHR Musculoskeletal Biomedical Research Unit, Nuffield Orthopaedic Centre, University of Oxford and the UK Medical Research Council, Medical Research Council Lifecourse Epidemiology Unit, University of Southampton.

**Competing interests** All authors have completed the Unified Competing Interest form at [http://www.icmje.org/coi\\_disclosure.pdf](http://www.icmje.org/coi_disclosure.pdf) (available on request from the corresponding author) and declare that: DJC, JM and AJ have no conflicts of interest; NKA has received consultancy payments, honoraria and consortium research grants, respectively, from: Flexion (PharmaNet), Lilly, Merck Sharp and Dohme, Q-Med, Roche; Amgen, GSK, NiCox and Smith & Nephew; Novartis, Pfizer, Schering-Plough and Servier.

1  
2  
3  
4  
5  
6  
7  
8  
9  
10  
11  
12  
13  
14  
15  
16  
17  
18  
19  
20  
21  
22  
23  
24  
25  
26  
27  
28  
29  
30  
31  
32  
33  
34  
35  
36  
37  
38  
39  
40  
41  
42  
43  
44  
45  
46  
47  
48  
49  
50  
51  
52  
53  
54  
55  
56  
57  
58  
59  
60

**Ethics approval** No ethical approval was required for this study.

**Provenance and peer review** Not commissioned; externally peer reviewed.

**Data sharing statement** No additional data are available.

For peer review only

Table 1 Clinical and Demographic characteristics – all subjects undergoing Total Hip or Knee Replacement

|                                       | Total Hip Replacement<br>(N=63,162) |                    | Total Knee Replacement<br>(N=54,276) |                    |
|---------------------------------------|-------------------------------------|--------------------|--------------------------------------|--------------------|
|                                       | Female<br>(N=39,292)                | Male<br>(N=23,870) | Female<br>(N=31,682)                 | Male<br>(N=22,594) |
| Age (mean, SD)                        | 70.5 (11.1)                         | 67.7 (11.0)        | 70.7 (9.6)                           | 69.4 (9.4)         |
| Gender (%)                            | 62.2                                | 37.8               | 58.3                                 | 41.6               |
| BMI (mean, SD)                        | 27.2 (5.1)                          | 27.7 (4.3)         | 29.6(5.6)                            | 28.8(4.4)          |
| Missing BMI (%)                       | 19.1                                | 19.3               | 13.8                                 | 14.0               |
| Revisions (N, %)                      | 1000 (2.55)                         | 811 (3.40)         | 572 (1.8)                            | 614 (2.7)          |
| Deaths pre-revision<br>(N, %)         | 6615 (16.8)                         | 4201 (17.6)        | 4110(13.0)                           | 3349 (14.8)        |
| Number of comorbid<br>conditions (%): |                                     |                    |                                      |                    |
| 0                                     | 42.8%                               | 48.1%              | 37.5%                                | 43.7%              |
| 1                                     | 34.2%                               | 31.0%              | 37.4%                                | 35.8%              |
| 2+                                    | 23.0%                               | 20.9%              | 25.2%                                | 20.6%              |

Table 2 Cumulative incidence rates for revision surgery at selected times following THR and TKR

| Years since total joint replacement | Hip                                  |                         |                                      |                         | Knee                                 |                         |                                      |                         |
|-------------------------------------|--------------------------------------|-------------------------|--------------------------------------|-------------------------|--------------------------------------|-------------------------|--------------------------------------|-------------------------|
|                                     | Female                               |                         | Male                                 |                         | Female                               |                         | Male                                 |                         |
|                                     | Cumulative incidence of revision (%) | 95% Confidence Interval | Cumulative incidence of revision (%) | 95% Confidence Interval | Cumulative incidence of revision (%) | 95% Confidence Interval | Cumulative incidence of revision (%) | 95% Confidence Interval |
| 1                                   | 0.6                                  | (0.5, 0.6)              | 0.7                                  | (0.6, 0.8)              | 0.3                                  | (0.2, 0.4)              | 0.4                                  | (0.3, 0.5)              |
| 3                                   | 1.2                                  | (1.1, 1.3)              | 1.4                                  | (1.3, 1.6)              | 1.1                                  | (1.0, 1.2)              | 1.5                                  | (1.4, 1.7)              |
| 5                                   | 1.8                                  | (1.7, 2.0)              | 2.2                                  | (2.0, 2.4)              | 1.6                                  | (1.5, 1.8)              | 2.3                                  | (2.1, 2.6)              |
| 10                                  | 3.4                                  | (3.1, 3.6)              | 4.6                                  | (4.3, 5.0)              | 2.8                                  | (2.5, 3.1)              | 4.5                                  | (4.1, 4.9)              |
| 15                                  | 6.0                                  | (5.5, 6.6)              | 8.3                                  | (7.6, 9.1)              | 4.4                                  | (3.9, 5.0)              | 7.1                                  | (6.2, 8.1)              |

Table 3a Estimated subhazard of revision for Total Hip Replacement – Competing risks analysis

|                                           | Univariable  |                         |         | Adjusted <sup>a</sup> |                         |         |
|-------------------------------------------|--------------|-------------------------|---------|-----------------------|-------------------------|---------|
|                                           | Hazard ratio | 95% Confidence Interval | p-value | Hazard ratio          | 95% Confidence Interval | p-value |
| <b>Gender</b>                             |              |                         |         |                       |                         |         |
| Female (reference)                        | 1.00         |                         |         | 1.00                  |                         |         |
| Male                                      | 1.35         | (1.23, 1.48)            | <0.001  | 1.23                  | (1.10, 1.38)            | <0.001  |
| <b>Age (years at THR)</b>                 |              |                         |         |                       |                         |         |
| (per additional year)                     | 0.970        | (0.967, 0.973)          | <0.001  | 0.971                 | (0.966, 0.975)          | <0.001  |
| <b>BMI<sup>a</sup> (kg/m<sup>2</sup>)</b> |              |                         |         |                       |                         |         |
| (per additional unit)                     | 1.030        | (1.020, 1.041)          | <0.001  | 1.020                 | (1.009, 1.032)          | <0.001  |

<sup>a</sup>Adjusted for smoking (Yes/No/Ex), drinking (Yes/No/Ex), number of comorbid conditions

<sup>b</sup>BMI available in 86.1% of patients

Table 3b Estimated subhazard of revision for Total Knee Replacement – Competing risks analysis

|                                           | Univariable  |                         |         | Adjusted <sup>a</sup> |                         |         |
|-------------------------------------------|--------------|-------------------------|---------|-----------------------|-------------------------|---------|
|                                           | Hazard ratio | 95% Confidence Interval | p-value | Hazard ratio          | 95% Confidence Interval | p-value |
| <b>Gender</b>                             |              |                         |         |                       |                         |         |
| Female (reference)                        | 1.00         |                         |         | 1.00                  |                         |         |
| Male                                      | 1.54         | (1.37, 1.72)            | <0.001  | 1.51                  | (1.32, 1.73)            | <0.001  |
| <b>Age (years at THR)</b>                 |              |                         |         |                       |                         |         |
| (per additional year)                     | 0.957        | (0.952, 0.961)          | <0.001  | 0.957                 | (0.951, 0.962)          | <0.001  |
| <b>BMI<sup>b</sup> (kg/m<sup>2</sup>)</b> |              |                         |         |                       |                         |         |
| (per additional unit)                     | 1.026        | (1.013, 1.038)          | <0.001  | 1.015                 | (1.002, 1.028)          | 0.023   |

<sup>a</sup>Adjusted for smoking (Yes/No/Ex), drinking (Yes/No/Ex), number of comorbid conditions

<sup>b</sup>BMI available in 80.9% of patients

Table 4a Estimated hazard of revision for THR– Univariable and adjusted Cox regression analysis with death as a censoring event

|                                           | Univariable  |                         |         | Adjusted <sup>a</sup> |                         |         |
|-------------------------------------------|--------------|-------------------------|---------|-----------------------|-------------------------|---------|
|                                           | Hazard ratio | 95% Confidence Interval | p-value | Hazard ratio          | 95% Confidence Interval | p-value |
| <b>Gender</b>                             |              |                         |         |                       |                         |         |
| Female (reference)                        | 1.00         |                         |         | 1.00                  |                         |         |
| Male                                      | 1.36         | (1.24, 1.29)            | <0.001  | 1.26                  | (1.13, 1.41)            | <0.001  |
| <b>Age (years at THR)</b>                 |              |                         |         |                       |                         |         |
| (per additional year)                     | 0.978        | (0.974, 0.983)          | <0.001  | 0.977                 | (0.972, 0.982)          | <0.001  |
| <b>BMI<sup>a</sup> (kg/m<sup>2</sup>)</b> |              |                         |         |                       |                         |         |
| (per additional unit)                     | 1.029        | (1.017, 1.040)          | <0.001  | 1.019                 | (1.008, 1.031)          | 0.001   |

<sup>a</sup>Adjusted for smoking (Yes/No/Ex), drinking (Yes/No/Ex), number of comorbid conditions

<sup>b</sup>BMI available in 86.1% of patients

Table 4b Estimated hazard of revision for TKR- Univariable and adjusted Cox regression analysis with death as a censoring event

|                                           | Univariable  |                         |         | Adjusted <sup>a</sup> |                         |         |
|-------------------------------------------|--------------|-------------------------|---------|-----------------------|-------------------------|---------|
|                                           | Hazard ratio | 95% Confidence Interval | p-value | Hazard ratio          | 95% Confidence Interval | p-value |
| <b>Gender</b>                             |              |                         |         |                       |                         |         |
| Female (reference)                        | 1.00         |                         |         | 1.00                  |                         |         |
| Male                                      | 1.58         | (1.41, 1.77)            | <0.001  | 1.55                  | (1.36, 1.77)            | <0.001  |
| <b>Age (years at THR)</b>                 |              |                         |         |                       |                         |         |
| (per additional year)                     | 0.962        | (0.956, 0.967)          | <0.001  | 0.961                 | (0.955, 0.968)          | <0.001  |
| <b>BMI<sup>a</sup> (kg/m<sup>2</sup>)</b> |              |                         |         |                       |                         |         |
| (per additional unit)                     | 1.024        | (1.012, 1.037)          | <0.001  | 1.015                 | (1.003, 1.028)          | 0.019   |

<sup>a</sup>Adjusted for smoking (Yes/No/Ex), drinking (Yes/No/Ex), number of comorbid conditions

<sup>b</sup>BMI available in 80.9% of patients



Figure 1a Cumulative incidence estimate for revision of THR by body mass index

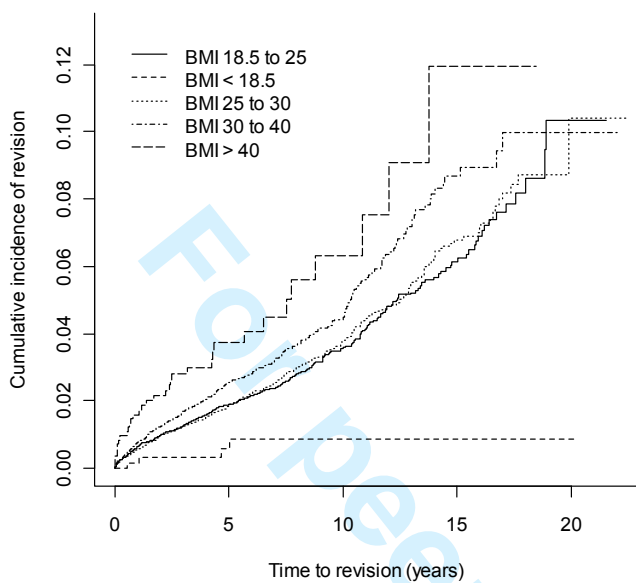

Figure 1b Cumulative incidence estimate for revision of TKR by body mass index

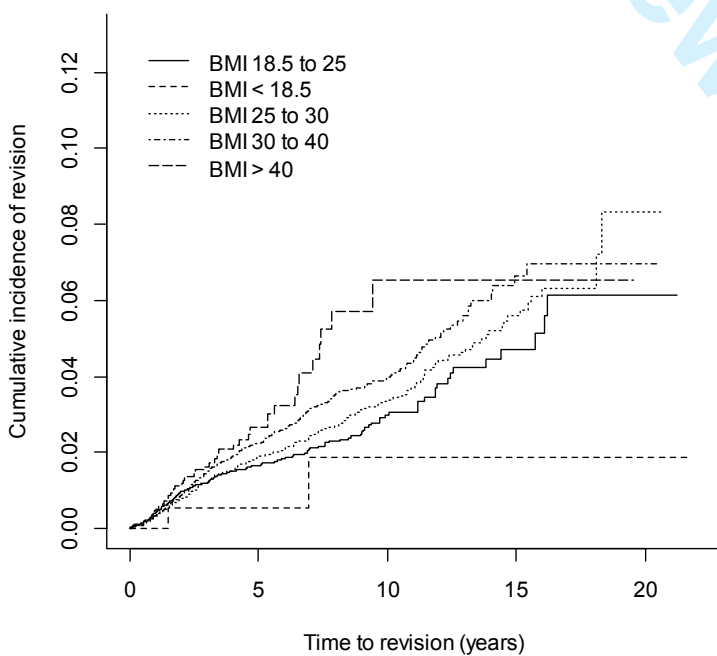

Figure 2a Cumulative incidence estimate for revision of THR by age

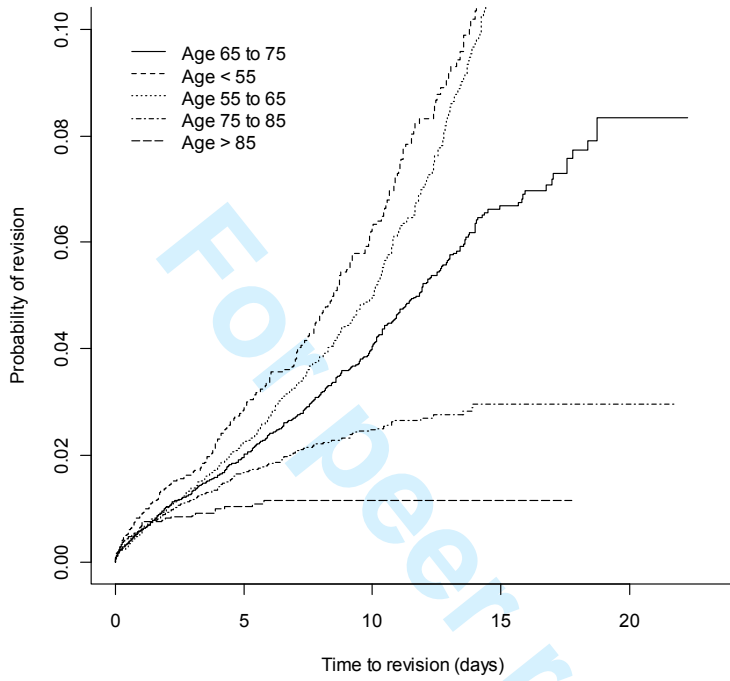

Figure 2b Cumulative incidence estimate for revision of TKR by age

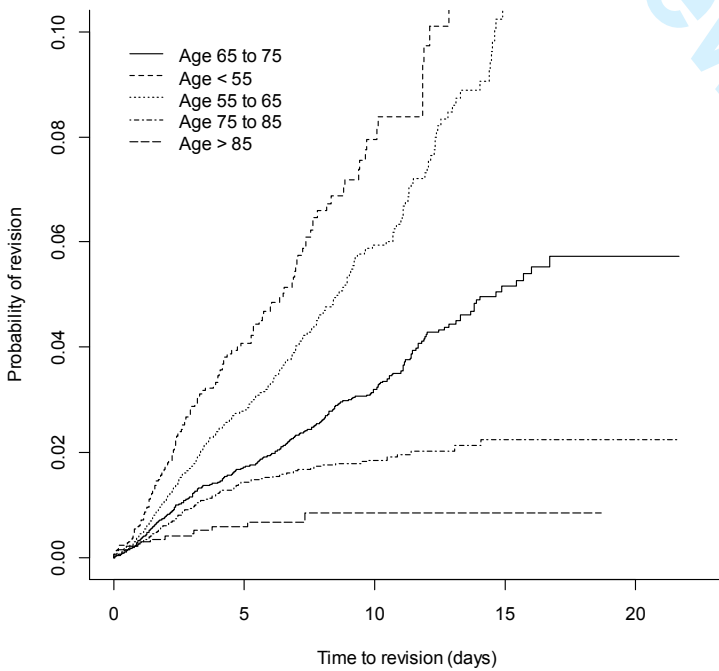

## REFERENCES

1. National Joint Registry for England and Wales: 9th Annual report. 2012.
2. Kurtz S, Mowat F, Ong K, Chan N, Lau E, Halpern M. Prevalence of primary and revision total hip and knee arthroplasty in the United States from 1990 through 2002. *The Journal of bone and joint surgery American volume*. 2005;87(7):1487-97. Epub 2005/07/05.
3. Sturmer T, Dreinhofer K, Grober-Gratz D, Brenner H, Dieppe P, Puhl W, et al. Differences in the views of orthopaedic surgeons and referring practitioners on the determinants of outcome after total hip replacement. *The Journal of bone and joint surgery British volume*. 2005;87(10):1416-9. Epub 2005/09/29.
4. Santaguida PL, Hawker GA, Hudak PL, Glazier R, Mahomed NN, Kreder HJ, et al. Patient characteristics affecting the prognosis of total hip and knee joint arthroplasty: a systematic review. *Canadian journal of surgery Journal canadien de chirurgie*. 2008;51(6):428-36. Epub 2008/12/06.
5. Commissioning Policy Statement: Referral and surgical threshold criteria for elective primary Hip Replacement Surgery. 2011.
6. Clinical threshold: hip replacement for the treatment of joint symptoms and functional limitation. 2011.
7. Commissioning decision: Hip and knee replacement surgery in obese patients (those with a body mass index of 30 or greater) Peninsula Commissioning Priorities Group, 2011.
8. Maradit Kremers H, Visscher SL, Moriarty JP, Reinalda MS, Kremers WK, Naessens JM, et al. Determinants of direct medical costs in primary and revision total knee arthroplasty. *Clinical orthopaedics and related research*. 2013;471(1):206-14. Epub 2012/08/07.
9. Vanhegan IS, Malik AK, Jayakumar P, Ul Islam S, Haddad FS. A financial analysis of revision hip arthroplasty: the economic burden in relation to the national tariff. *The Journal of bone and joint surgery British volume*. 2012;94(5):619-23. Epub 2012/04/25.
10. International Society of Arthroplasty Registers. Available from: <http://www.isarhome.org/directory>.
11. Serra-Sutton V, Allepuz A, Espallargues M, Labek G, Pons JM. Arthroplasty registers: a review of international experiences. *International journal of technology assessment in health care*. 2009;25(1):63-72. Epub 2009/01/08.
12. Kurtz SM, Ong KL, Lau E, Widmer M, Maravic M, Gomez-Barrena E, et al. International survey of primary and revision total knee replacement. *International orthopaedics*. 2011;35(12):1783-9. Epub 2011/03/16.
13. Jameson SS, Baker PN, Mason J, Porter ML, Deehan DJ, Reed MR. Independent predictors of revision following metal-on-metal hip resurfacing: a retrospective cohort study using National Joint Registry data. *The Journal of bone and joint surgery British volume*. 2012;94(6):746-54. Epub 2012/05/26.
14. Havelin LI, Robertsson O, Fenstad AM, Overgaard S, Garellick G, Furnes O. A Scandinavian experience of register collaboration: the Nordic Arthroplasty Register Association (NARA). *The Journal of bone and joint surgery American volume*. 2011;93 Suppl 3:13-9. Epub 2012/01/25.
15. Parkinson J, Davis S, TP vS. The General Practice Research (GPRD) Database: Now and the Future. In: Mann R, Andrews E, editors. *Pharmacovigilance*. 2nd ed. Chichester, West Sussex, England: John Wiley & Sons, Ltd.; 2007. p. 341-8.
16. Fine JP, Gray RJ. A proportional hazards model for the subdistribution of a competing risk. *J Am Stat Assoc*. 1999;94(446):496-509.
17. Berry SD, Ngo L, Samelson EJ, Kiel DP. Competing risk of death: an important consideration in studies of older adults. *Journal of the American Geriatrics Society*. 2010;58(4):783-7. Epub 2010/03/30.
18. Liu B, Balkwill A, Banks E, Cooper C, Green J, Beral V. Relationship of height, weight and body mass index to the risk of hip and knee replacements in middle-aged women. *Rheumatology (Oxford)*. 2007;46(5):861-7. Epub 2007/02/07.

- 1  
2  
3 19. Lubbeke A, Stern R, Garavaglia G, Zurcher L, Hoffmeyer P. Differences in outcomes of obese  
4 women and men undergoing primary total hip arthroplasty. *Arthritis and rheumatism*.  
5 2007;57(2):327-34. Epub 2007/03/03.  
6  
7 20. AbdelSalam H, Restrepo C, Tarity TD, Sangster W, Parvizi J. Predictors of intensive care unit  
8 admission after total joint arthroplasty. *The Journal of arthroplasty*. 2012;27(5):720-5. Epub  
9 2011/11/18.  
10 21. Andrew JG, Palan J, Kurup HV, Gibson P, Murray DW, Beard DJ. Obesity in total hip  
11 replacement. *The Journal of bone and joint surgery British volume*. 2008;90(4):424-9. Epub  
12 2008/04/02.  
13 22. Lubbeke A, Katz JN, Perneger TV, Hoffmeyer P. Primary and revision hip arthroplasty: 5-year  
14 outcomes and influence of age and comorbidity. *The Journal of rheumatology*. 2007;34(2):394-400.  
15 Epub 2006/12/05.  
16 23. Horan F. Obesity and joint replacement. *The Journal of bone and joint surgery British*  
17 *volume*. 2006;88(10):1269-71. Epub 2006/10/03.  
18 24. Yeung E, Jackson M, Sexton S, Walter W, Zicat B. The effect of obesity on the outcome of hip  
19 and knee arthroplasty. *International orthopaedics*. 2011;35(6):929-34. Epub 2010/06/01.  
20 25. McCalden RW, Charron KD, MacDonald SJ, Bourne RB, Naudie DD. Does morbid obesity  
21 affect the outcome of total hip replacement?: an analysis of 3290 THRs. *The Journal of bone and*  
22 *joint surgery British volume*. 2011;93(3):321-5. Epub 2011/03/02.  
23 26. Fennema P, Lubsen J. Survival analysis in total joint replacement: an alternative method of  
24 accounting for the presence of competing risk. *The Journal of bone and joint surgery British volume*.  
25 2010;92(5):701-6. Epub 2010/05/04.  
26 27. Ranstam J, Karrholm J, Pulkkinen P, Makela K, Espehaug B, Pedersen AB, et al. Statistical  
27 analysis of arthroplasty data. II. Guidelines. *Acta orthopaedica*. 2011;82(3):258-67. Epub 2011/05/31.  
28 28. Gillam MH, Ryan P, Graves SE, Miller LN, de Steiger RN, Salter A. Competing risks survival  
29 analysis applied to data from the Australian Orthopaedic Association National Joint Replacement  
30 Registry. *Acta orthopaedica*. 2010;81(5):548-55. Epub 2010/10/06.  
31  
32  
33  
34  
35  
36  
37  
38  
39  
40  
41  
42  
43  
44  
45  
46  
47  
48  
49  
50  
51  
52  
53  
54  
55  
56  
57  
58  
59  
60

STROBE Statement—Checklist of items that should be included in reports of *cohort studies*

|                           | Item No | Recommendation                                                                                                                                                                                                                                                                                                                                                                                                                                                           |
|---------------------------|---------|--------------------------------------------------------------------------------------------------------------------------------------------------------------------------------------------------------------------------------------------------------------------------------------------------------------------------------------------------------------------------------------------------------------------------------------------------------------------------|
| <b>Title and abstract</b> | 1       | <p>(a) Indicate the study's design with a commonly used term in the title or the abstract</p> <p><i>Population-based case cohort design (mentioned in Abstract/Method)</i></p> <p>(b) Provide in the abstract an informative and balanced summary of what was done and what was found</p> <p><i>Competing risks survival (mentioned in Abstract/Method)</i></p>                                                                                                          |
| <b>Introduction</b>       |         |                                                                                                                                                                                                                                                                                                                                                                                                                                                                          |
| Background/rationale      | 2       | <p>Explain the scientific background and rationale for the investigation being reported</p> <p><i>Age/gender available in National Joint Registry, but BMI has missing data. GPRD has good level of completeness for BMI.</i></p>                                                                                                                                                                                                                                        |
| Objectives                | 3       | <p>State specific objectives, including any prespecified hypotheses</p> <p><i>To provide population-based estimates for the effects of BMI on time to revision, with long follow-up (mentioned in Introduction).</i></p>                                                                                                                                                                                                                                                 |
| <b>Methods</b>            |         |                                                                                                                                                                                                                                                                                                                                                                                                                                                                          |
| Study design              | 4       | <p>Present key elements of study design early in the paper</p> <p><i>Method of Fine and Gray referred to (top of Analysis subsection in Methods section)</i></p>                                                                                                                                                                                                                                                                                                         |
| Setting                   | 5       | <p>Describe the setting, locations, and relevant dates, including periods of recruitment, exposure, follow-up, and data collection</p> <p><i>Fully described in Participants subsection in Methods section.</i></p>                                                                                                                                                                                                                                                      |
| Participants              | 6       | <p>(a) Give the eligibility criteria, and the sources and methods of selection of participants. Describe methods of follow-up</p> <p><i>"all patients in the database with a diagnosis code for total hip or knee arthroplasty from the beginning of 1991 until August 2011", quoted in the Participants subsection in Methods section.</i></p> <p>(b) For matched studies, give matching criteria and number of exposed and unexposed</p> <p><i>Not applicable.</i></p> |
| Variables                 | 7       | <p>Clearly define all outcomes, exposures, predictors, potential confounders, and effect modifiers. Give diagnostic criteria, if applicable</p> <p><i>All defined in the Analysis subsection in Methods section: Outcome: time to first incidence of revision surgery, predictors: BMI, age, gender, potential confounders: smoking status, alcohol consumption, number of comorbid conditions.</i></p>                                                                  |
| Data sources/measurement  | 8*      | <p>For each variable of interest, give sources of data and details of methods of assessment (measurement). Describe comparability of assessment methods if there is more than one group</p> <p><i>In the Analysis subsection in Methods section. Single group comprising those undergoing total replacement of the hip/knee (no controls).</i></p>                                                                                                                       |
| Bias                      | 9       | <p>Describe any efforts to address potential sources of bias</p> <p><i>In the Analysis subsection in Methods section. Comorbid conditions are a possible source of bias, hence the adjustment.</i></p>                                                                                                                                                                                                                                                                   |
| Study size                | 10      | <p>Explain how the study size was arrived at</p> <p><i>Population-based study. The GPRD is sized to enable precise estimates for most geographic/demographic subgroups.</i></p>                                                                                                                                                                                                                                                                                          |
| Quantitative variables    | 11      | <p>Explain how quantitative variables were handled in the analyses. If applicable, describe which groupings were chosen and why</p> <p><i>BMI was grouped according to WHO guidelines.</i></p>                                                                                                                                                                                                                                                                           |

|    |                     |     |                                                                                                                                                   |
|----|---------------------|-----|---------------------------------------------------------------------------------------------------------------------------------------------------|
| 1  | Statistical methods | 12  | (a) Describe all statistical methods, including those used to control for confounding<br><i>Done (in Analysis subsection in Methods section).</i> |
| 2  |                     |     |                                                                                                                                                   |
| 3  |                     |     |                                                                                                                                                   |
| 4  |                     |     | (b) Describe any methods used to examine subgroups and interactions                                                                               |
| 5  |                     |     | <i>Two-way interactions examined (described in Analysis subsection in Methods</i>                                                                 |
| 6  |                     |     | <i>section)</i>                                                                                                                                   |
| 7  |                     |     | (c) Explain how missing data were addressed                                                                                                       |
| 8  |                     |     | <i>Presence of BMI (in table 1) was sufficiently complete (&gt;80% knees; &gt;85% hips) and</i>                                                   |
| 9  |                     |     | <i>age and gender were 100% complete.</i>                                                                                                         |
| 10 |                     |     |                                                                                                                                                   |
| 11 |                     |     | (d) If applicable, explain how loss to follow-up was addressed                                                                                    |
| 12 |                     |     | <i>Not applicable in such a dataset (most patients remained registered with the same GP</i>                                                       |
| 13 |                     |     | <i>in the GPRD, those leaving are not traceable).</i>                                                                                             |
| 14 |                     |     |                                                                                                                                                   |
| 15 |                     |     | (e) Describe any sensitivity analyses                                                                                                             |
| 16 |                     |     | <i>Cox regression used as a sensitivity vs. Competing Risks Regression (described in</i>                                                          |
| 17 |                     |     | <i>Analysis subsection in Methods section).</i>                                                                                                   |
| 18 | <b>Results</b>      |     |                                                                                                                                                   |
| 19 | <hr/>               |     |                                                                                                                                                   |
| 20 | Participants        | 13* | (a) Report numbers of individuals at each stage of study—eg numbers potentially                                                                   |
| 21 |                     |     | eligible, examined for eligibility, confirmed eligible, included in the study,                                                                    |
| 22 |                     |     | completing follow-up, and analysed                                                                                                                |
| 23 |                     |     | <i>Numbers given in table 1.</i>                                                                                                                  |
| 24 |                     |     |                                                                                                                                                   |
| 25 |                     |     | (b) Give reasons for non-participation at each stage                                                                                              |
| 26 |                     |     | <i>Not applicable (population-based data)</i>                                                                                                     |
| 27 |                     |     |                                                                                                                                                   |
| 28 |                     |     | (c) Consider use of a flow diagram                                                                                                                |
| 29 | Descriptive data    | 14* | (a) Give characteristics of study participants (eg demographic, clinical, social) and                                                             |
| 30 |                     |     | information on exposures and potential confounders                                                                                                |
| 31 |                     |     | <i>Characteristics given in table 1.</i>                                                                                                          |
| 32 |                     |     |                                                                                                                                                   |
| 33 |                     |     | (b) Indicate number of participants with missing data for each variable of interest                                                               |
| 34 |                     |     | <i>Given for BMI (the only variable of interest with missingness)</i>                                                                             |
| 35 |                     |     |                                                                                                                                                   |
| 36 |                     |     | (c) Summarise follow-up time (eg, average and total amount)                                                                                       |
| 37 | Outcome data        | 15* | Report numbers of outcome events or summary measures over time                                                                                    |
| 38 |                     |     | <i>Number of revisions reported in table 1.</i>                                                                                                   |
| 39 | Main results        | 16  | (a) Give unadjusted estimates and, if applicable, confounder-adjusted estimates and                                                               |
| 40 |                     |     | their precision (eg, 95% confidence interval). Make clear which confounders were                                                                  |
| 41 |                     |     | adjusted for and why they were included                                                                                                           |
| 42 |                     |     | <i>Provided in tables 2, 3 and 4</i>                                                                                                              |
| 43 |                     |     |                                                                                                                                                   |
| 44 |                     |     | (b) Report category boundaries when continuous variables were categorized                                                                         |
| 45 |                     |     | <i>Done (Results section; subsection entitled Survival Analysis)</i>                                                                              |
| 46 |                     |     |                                                                                                                                                   |
| 47 |                     |     | (c) If relevant, consider translating estimates of relative risk into absolute risk for a                                                         |
| 48 |                     |     | meaningful time period                                                                                                                            |
| 49 |                     |     | <i>Not appropriate for this data, although we have provided estimates of numbers</i>                                                              |
| 50 |                     |     | <i>needed to “treat” (NNT).</i>                                                                                                                   |
| 51 | Other analyses      | 17  | Report other analyses done—eg analyses of subgroups and interactions, and                                                                         |
| 52 |                     |     | sensitivity analyses                                                                                                                              |
| 53 |                     |     | <i>Done (Piecewise analysis and Cox regression – both documented in Results section;</i>                                                          |
| 54 |                     |     | <i>subsection entitled Survival Analysis)</i>                                                                                                     |
| 55 | <b>Discussion</b>   |     |                                                                                                                                                   |
| 56 | Key results         | 18  | Summarise key results with reference to study objectives                                                                                          |
| 57 |                     |     | <i>Described in first few paragraphs of discussion.</i>                                                                                           |
| 58 |                     |     |                                                                                                                                                   |
| 59 | Limitations         | 19  | Discuss limitations of the study, taking into account sources of potential bias or                                                                |
| 60 |                     |     | imprecision. Discuss both direction and magnitude of any potential bias                                                                           |

|                          |    |                                                                                                                                                                                                                                                                                         |
|--------------------------|----|-----------------------------------------------------------------------------------------------------------------------------------------------------------------------------------------------------------------------------------------------------------------------------------------|
|                          |    | Limitations covered in penultimate paragraph of discussion (e.g. lack of reliable indication data, long follow-up but includes older prostheses).                                                                                                                                       |
| Interpretation           | 20 | Give a cautious overall interpretation of results considering objectives, limitations, multiplicity of analyses, results from similar studies, and other relevant evidence<br>Covered in the middle part of the discussion section.                                                     |
| Generalisability         | 21 | Discuss the generalisability (external validity) of the study results<br>Population-based study so results are generalisable to the (gender-specific) UK adult population as a whole. Stated in 'Strengths and Limitations' subsection of Discussion section.                           |
| <b>Other information</b> |    |                                                                                                                                                                                                                                                                                         |
| Funding                  | 22 | Give the source of funding and the role of the funders for the present study and, if applicable, for the original study on which the present article is based<br>NIHR Programme Grant for Applied Research grant number given in relevant section immediately following the discussion. |

\*Give information separately for exposed and unexposed groups.

**Note:** An Explanation and Elaboration article discusses each checklist item and gives methodological background and published examples of transparent reporting. The STROBE checklist is best used in conjunction with this article (freely available on the Web sites of PLoS Medicine at <http://www.plosmedicine.org/>, Annals of Internal Medicine at <http://www.annals.org/>, and Epidemiology at <http://www.epidem.com/>). Information on the STROBE Initiative is available at <http://www.strobe-statement.org>.

# Please wait...

If this message is not eventually replaced by the proper contents of the document, your PDF viewer may not be able to display this type of document.

You can upgrade to the latest version of Adobe Reader for Windows®, Mac, or Linux® by visiting [http://www.adobe.com/go/reader\\_download](http://www.adobe.com/go/reader_download).

For more assistance with Adobe Reader visit <http://www.adobe.com/go/acrreader>.

Windows is either a registered trademark or a trademark of Microsoft Corporation in the United States and/or other countries. Mac is a trademark of Apple Inc., registered in the United States and other countries. Linux is the registered trademark of Linus Torvalds in the U.S. and other countries.



# Please wait...

If this message is not eventually replaced by the proper contents of the document, your PDF viewer may not be able to display this type of document.

You can upgrade to the latest version of Adobe Reader for Windows®, Mac, or Linux® by visiting [http://www.adobe.com/go/reader\\_download](http://www.adobe.com/go/reader_download).

For more assistance with Adobe Reader visit <http://www.adobe.com/go/acrreader>.

Windows is either a registered trademark or a trademark of Microsoft Corporation in the United States and/or other countries. Mac is a trademark of Apple Inc., registered in the United States and other countries. Linux is the registered trademark of Linus Torvalds in the U.S. and other countries.

# Please wait...

If this message is not eventually replaced by the proper contents of the document, your PDF viewer may not be able to display this type of document.

You can upgrade to the latest version of Adobe Reader for Windows®, Mac, or Linux® by visiting [http://www.adobe.com/go/reader\\_download](http://www.adobe.com/go/reader_download).

For more assistance with Adobe Reader visit <http://www.adobe.com/go/acrreader>.

Windows is either a registered trademark or a trademark of Microsoft Corporation in the United States and/or other countries. Mac is a trademark of Apple Inc., registered in the United States and other countries. Linux is the registered trademark of Linus Torvalds in the U.S. and other countries.

# Please wait...

If this message is not eventually replaced by the proper contents of the document, your PDF viewer may not be able to display this type of document.

You can upgrade to the latest version of Adobe Reader for Windows®, Mac, or Linux® by visiting [http://www.adobe.com/go/reader\\_download](http://www.adobe.com/go/reader_download).

For more assistance with Adobe Reader visit <http://www.adobe.com/go/acrreader>.

Windows is either a registered trademark or a trademark of Microsoft Corporation in the United States and/or other countries. Mac is a trademark of Apple Inc., registered in the United States and other countries. Linux is the registered trademark of Linus Torvalds in the U.S. and other countries.



**A population-based survival analysis describing the association of body mass index on time to revision for total hip and knee replacements: Results from the UK General Practice Research Database**

|                                 |                                                                                                                                                                                                                                                                                                                                                                                                                                                                 |
|---------------------------------|-----------------------------------------------------------------------------------------------------------------------------------------------------------------------------------------------------------------------------------------------------------------------------------------------------------------------------------------------------------------------------------------------------------------------------------------------------------------|
| Journal:                        | <i>BMJ Open</i>                                                                                                                                                                                                                                                                                                                                                                                                                                                 |
| Manuscript ID:                  | bmjopen-2013-003614.R1                                                                                                                                                                                                                                                                                                                                                                                                                                          |
| Article Type:                   | Research                                                                                                                                                                                                                                                                                                                                                                                                                                                        |
| Date Submitted by the Author:   | 03-Oct-2013                                                                                                                                                                                                                                                                                                                                                                                                                                                     |
| Complete List of Authors:       | Culliford, David; University of Southampton, Faculty of Medicine<br>Maskell, Joe; University of Southampton, Public Health Sciences and Medical Statistics<br>Judge, Andrew; University of Oxford, NIHR Musculoskeletal Biomedical Research Unit; University of Southampton, MRC Lifecourse Epidemiology Unit<br>Arden, Nigel; University of Oxford, NIHR Musculoskeletal Biomedical Research Unit; University of Southampton, MRC Lifecourse Epidemiology Unit |
| <b>Primary Subject Heading</b>: | Epidemiology                                                                                                                                                                                                                                                                                                                                                                                                                                                    |
| Secondary Subject Heading:      | Surgery                                                                                                                                                                                                                                                                                                                                                                                                                                                         |
| Keywords:                       | Adult orthopaedics < ORTHOPAEDIC & TRAUMA SURGERY, Hip < ORTHOPAEDIC & TRAUMA SURGERY, Knee < ORTHOPAEDIC & TRAUMA SURGERY                                                                                                                                                                                                                                                                                                                                      |
|                                 |                                                                                                                                                                                                                                                                                                                                                                                                                                                                 |

SCHOLARONE™  
Manuscripts

1  
2  
3 **A POPULATION-BASED SURVIVAL ANALYSIS DESCRIBING THE ASSOCIATION OF BODY**  
4 **MASS INDEX ON TIME TO REVISION FOR TOTAL HIP AND KNEE REPLACEMENTS:**  
5 **RESULTS FROM THE UK GENERAL PRACTICE RESEARCH DATABASE.**  
6  
7  
8  
9

10  
11 **STUDY DESIGN:** Population-based study.  
12

13  
14  
15 **AUTHORS' NAMES AND AFFILIATIONS**  
16

17 David Culliford (Senior Medical Statistician)<sup>1</sup>  
18

19 Joe Maskell (Data Manager)<sup>2</sup>  
20

21 Andy Judge (Senior Medical Statistician)<sup>3,4</sup>  
22

23 Nigel K Arden (Professor of Rheumatic Diseases and Director)<sup>3,4</sup>  
24

25 and the COAST Study group  
26  
27

28 <sup>1</sup>Faculty of Medicine, University of Southampton, Tremona Road, Southampton. SO16 6YD.  
29

30 <sup>2</sup>Public Health Sciences and Medical Statistics, Faculty of Medicine, University of  
31 Southampton, Tremona Road, Southampton, SO16 6YD.  
32

33 <sup>3</sup>NIHR Musculoskeletal Biomedical Research Unit, University of Oxford, Nuffield  
34 Orthopaedic Centre, Windmill Road, Oxford, OX3 7LD.  
35

36 <sup>4</sup>MRC Lifecourse Epidemiology Unit, University of Southampton, Southampton General  
37 Hospital, SO16 6YB.  
38  
39  
40  
41  
42  
43  
44  
45  
46  
47  
48  
49  
50  
51  
52  
53  
54  
55  
56  
57  
58  
59  
60

2

**ABSTRACT**

**Objectives** Against a backdrop of rising levels of obesity, we describe and estimate associations of body mass index (BMI), age and gender with time to revision for subjects undergoing primary total hip (THR) or knee (TKR) replacement in the UK.

**Design** Population-based cohort study

**Setting** Routinely collected primary care data from a representative sample of general practices, including linked data on all secondary care events.

**Participants** Population-based cohort study of **63,162** THR and **54,276** TKR patients in the UK General Practice Research Database between 1988 and 2011.

**Primary and secondary outcomes** Risk of THR and TKR revision associated with BMI, age and gender, after adjusting for the competing risk of death.

**Results** The five-year cumulative incidence rate for THR was 2.2% for men and 1.8% for women (TKR: 2.3% for men, 1.6% for women). The adjusted overall subhazard ratios for THR patients undergoing subsequent hip revision surgery, with a competing risk of death, were estimated at 1.020 (95% CI: 1.009, 1.032) per additional unit (kg/m<sup>2</sup>) of BMI, 1.23 (95% CI: 1.10, 1.38) for men compared with women and 0.970 (95% CI: 0.967, 0.973) per additional year of age. For TKR patients, the equivalent estimates were 1.015 (95% CI: 1.002, 1.028) for BMI; 1.51 (95% CI: 1.32, 1.73) for gender, and 0.957 (95% CI: 0.951, 0.962) for age. Morbidly obese THR patients had a 65.5% increase (95% CI: 15.4%, 137.3%, p=0.006) in the subhazard of revision versus the normal BMI group (18.5 to 25). The effect for TKR was smaller (a 43.9% increase) and weaker (95% CI: 2.6%, 103.9%, p=0.040).

1  
2  
3  
4  
5 **Conclusions** Body mass index is estimated to have a small but statistically significant  
6 association with the risk of hip and knee revision, but absolute numbers are small. Further  
7 studies are needed in order to distinguish between effects for specific revision surgery  
8 indications.  
9  
10  
11  
12

#### 21 **WHAT IS ALREADY KNOWN ON THIS TOPIC**

22  
23  
24 Published revision rates for hip and knee replacement already exist, based on UK-based  
25 registry data, but follow-up periods are still relatively short.  
26

27  
28 Some evidence exists that obesity is a risk factor for undergoing primary total hip and knee  
29 replacements, but there is little in the literature for the risks of raised BMI on revision  
30 surgery.  
31  
32

33  
34 The recording of BMI prior to primary total hip or knee replacement is less than complete  
35 in most national joint registries.  
36  
37  
38  
39

#### 40 **WHAT THIS STUDY ADDS**

41  
42 Body mass index is estimated to have a small positive association with the risk of hip and  
43 knee revision, after allowing for the competing risk of death.  
44

45  
46 The elevated risk of revision of the hip in morbidly obese (> 40 kg/m<sup>2</sup>) patients during the  
47 first year after primary replacement is not observed in the knee.  
48

49  
50 It would take 175 TKR patients (152 for THR) to reduce their baseline BMI from obese to  
51 normal in order to prevent one revision operation after 5 years.  
52  
53  
54  
55  
56  
57  
58  
59  
60

## ARTICLE SUMMARY

### Article focus

- Total joint replacement of the hip (THR) or knee (TKR) is commonly used as an intervention for patients with end-stage osteoarthritis of the lower limb.
- Joint prostheses sometimes require revision surgery and it is important for surgeons, patients and policy makers to understand the risk factors for time to revision.
- Although many studies modelling the time to joint revision have taken over the past 30 years, few such studies have been large-scale, population-based, competing risks analyses.

### Key messages

- These data from the GPRD shows a small but significant association between body mass index and the time to revision for both hip and knee replacement.
- The risk of hip replacement revision for morbidly obese patients was two-thirds higher than for those with normal body mass index.
- The use of competing risks methods produced similar estimates of revision risk to those obtained using relative risks regression methods.

### Strengths and potential limitations of the study

- The large sample size of the GPRD (over 5% of the UK general practice population) enables population-level inferences to be made
- The statistical methods explicitly account for the competing risk of death which has a much higher event rate than the event of interest (THR or TKR) in this patient group.
- GPRD data does not have directly linked information detailing the reasons for being referred for surgery, so we were unable to establish an exact indication.



## INTRODUCTION

Total joint replacement of the hip and knee are well established as interventions for those suffering with end-stage osteoarthritis (OA) of the lower limb, with OA being the most frequent indication for total hip or knee replacement in the UK(1) (over 90% for hips and over 95% for knees). Yet hip and knee prostheses do not necessarily continue to function effectively for the lifetime of the patient(1, 2). Many traditional metal-on-polyethylene implants are likely to require revision surgery due to wear after 20 years of use due to wear characteristics and peri-prosthetic loosening. As a consequence, elective THR and TKR procedures have until relatively recently been indicated mainly in older patients, but even prostheses which make use of the latest technological developments (*e.g.* unicondylar knee prostheses) are not yet routinely recommended for use in younger patients.

A further dimension is added by the increasing prevalence of obesity in western populations, with clinicians in some cases considering patients too obese to undergo surgery(3, 4), partly due to the perceived increase in risk of both peri- and post-operative complications. There have also been examples of obese and/or morbidly obese patients experiencing restricted access to hip replacement surgery in some parts of the UK(5-7) where local healthcare planners have had similar concerns.

Revision procedures involve a surgical intervention to correct a prosthesis which is not functioning properly. Such operations are more costly than the original replacement procedure(8, 9) and are often more complex, with a higher level of risk to the patient. Population-based estimates of the time from primary surgery to a revision procedure are of importance to orthopaedic surgeons, rheumatologists, healthcare providers, policymakers and patients. Registry data, both in the U.K.(1) and internationally(10, 11), have been used extensively to estimate time to revision(12). Such data has been used previously to model

6

1  
2  
3 prosthesis survival time in order to assess which specific demographic, clinical and  
4  
5 prosthesis-specific factors are associated with time to failure(13, 14).  
6  
7

8  
9 Over the 12 months to April 2011, there were over 178,000 total hip and knee replacement  
10  
11 operations recorded in the National Joint Registry (NJR) for England and Wales(1). The NJR  
12  
13 began recording data in 2003, and although it now contains virtually all replacements  
14  
15 carried out in England and Wales, the maximum follow-up is currently less than ten years.  
16  
17 The registry contains complete data on many variables, including age and gender, but body  
18  
19 mass index is recorded in approximately 61% of subjects undergoing hip replacement  
20  
21 (62% for knee). We chose to use data from a primary care database with long follow-up  
22  
23 and UK-wide coverage.  
24  
25

26  
27  
28 The primary aim of this study was to use data from the General Practice Research Database  
29  
30 to produce population-based estimates for the association of body mass index, age and  
31  
32 gender with the time to revision surgery in the long term following a THR or TKR.  
33  
34  
35

## 36 **METHOD**

### 37 **Participants**

38  
39 We used data from the General Practice Research Database (GPRD). The GPRD comprises  
40  
41 the entire computerized medical records of a sample of patients attending general  
42  
43 practitioners (GPs) in the UK covering a population of 6.5 million patients from over 600  
44  
45 contributing practices chosen to be representative of the wider UK population(15). GPs in  
46  
47 the UK play a key role in the delivery of healthcare by providing primary care and referral  
48  
49 to specialist hospital services. Patients are registered with one practice that stores medical  
50  
51 information from primary care and hospital attendances. The GPRD has recently become  
52  
53  
54  
55  
56  
57  
58  
59  
60

1  
2  
3 part of the new Clinical Practice Research Datalink (CPRD) which is administered by the  
4  
5 Medicines and Healthcare products Regulatory Agency (MHRA).  
6  
7

8  
9 The GPRD records contain all clinical and referral events in both primary and secondary  
10  
11 care in addition to comprehensive demographic information, prescription data, and  
12  
13 hospital admissions. Data is stored using Read codes for diseases that are cross-referenced  
14  
15 to the International Classification of Diseases (ICD-9). Read codes are used as the standard  
16  
17 clinical terminology system within UK primary care. Only practices that pass quality  
18  
19 control are used as part of the GPRD database. Deleting or encoding personal and clinic  
20  
21 identifiers ensures the confidentiality of information in the GPRD. The GPRD comprises  
22  
23 entire general practice populations rather than probability-based samples of patients.  
24  
25

26  
27  
28 We identified all patients in the database with a diagnosis code for total hip or knee  
29  
30 arthroplasty from the beginning of 1991 until August 2011. We then identified any  
31  
32 secondary (revision) hip or knee operations for these patients which occurred subsequent  
33  
34 to the primary operation. The list of Read codes used to identify the primary and revision  
35  
36 operations were independently reviewed by different clinicians and a consensus list agreed  
37  
38 between them. Deaths recorded within the GPRD were also identified. The date of the first  
39  
40 incidence of a subject's hip or knee replacement was used as the start time. The event of  
41  
42 interest in all time-to-event models was the first recorded revision operation. Censoring  
43  
44 events were the end of study date (11<sup>th</sup> August 2011) or the transfer of a patient out of the  
45  
46 GPRD for any reason other than death. Death from any cause was treated as a competing  
47  
48 risk in the primary analysis. Patients were included in the analysis if aged 18 years or over  
49  
50 at the time of the replacement operation. Participant demographics including age, gender,  
51  
52 pre-operative body mass index (BMI), smoking and drinking status were collated, in  
53  
54 addition to information on comorbid conditions.  
55  
56  
57  
58  
59  
60

## Analysis

We used the competing risks regression methods of Fine and Gray(16) to estimate the effects of a subject's body mass index (BMI), age and gender on the time to revision of a prosthesis implanted during a THR or TKR operation. The substantive event of interest was the first incidence of revision surgery, with all-cause mortality separately identified as a competing risk. The rationale for using competing risks regression is that methods which treat death as just another censoring event may overestimate risk for an event of interest, especially in an older population(17). We adjusted for a range of important covariates and potential confounders: smoking status, alcohol consumption and the number of comorbid conditions (which include diabetes, hypertension, stroke, cardiovascular disease and anaemia). All covariates were treated as fixed at baseline. Analyses for hips and knees were performed separately, with prosthesis survival at the end of follow-up being of primary interest. Proportionality of hazards assumptions was assessed by examining complementary log-log plots of the cumulative incidence. As a sensitivity analysis we modelled the same data using standard methods which do not cater for competing risks (*i.e.* Cox regression analysis with death as a censoring event). We also calculated stand-alone estimates for the cumulative incidence of revision surgery at 1, 5, 10 and 15 years, and plotted estimates of the age-, gender- and BMI-specific cumulative incidence curves for the whole cohort.

All tests of significance were at the 5% level and two-sided. Interval estimates were based on 95% confidence intervals. The main statistical analysis was carried out using R (R Core Team, 2012. R Foundation for Statistical Computing, Vienna, Austria), SAS version 9.2 (SAS Institute Inc., Cary, NC) and Stata (StataCorp. 2011. Stata Statistical Software: Release 12. College Station, TX).

## RESULTS

### Participant demographics

Over the study period the database contained 63,162 patients undergoing total hip replacement and 54,276 patients undergoing total knee replacement. The average age at replacement was similar in both the THR and the TKR groups but the proportion of women was greater for both THR and TKR (table 1). For those with a recorded pre-operative BMI, the proportion of obese subjects (BMI  $\geq 30$  kg/m<sup>2</sup>) was 26.2% for THR and 39.8% for TKR and the proportion of morbidly obese subjects (which we define as having a BMI  $\geq 40$  kg/m<sup>2</sup>) was 1.6% for THR and 3.6% for TKR. Eighty percent of pre-operative BMI values used were recorded within five years of the primary operation. Table 1 describes the baseline characteristics of the cohort, including summary statistics and missing data percentages for all explanatory variables where complete data was not observed.

### Survival analysis

The estimated cumulative incidence of revision at five years was 2.0% (95% CI: 1.8, 2.1) for THR and 1.9% (95% CI: 1.8, 2.1) for TKR. For women, cumulative incidence at five years was 1.8% (95% CI: 1.7, 2.0) for THR and 1.6% (95% CI: 1.5, 1.8) for TKR, and for men 2.2% (95% CI: 2.0, 2.4) and 2.3% (95% CI: 2.1, 2.6) respectively. Table 2 provides gender-specific estimates of cumulative incidence with point-wise confidence intervals for a range of times (1, 3, 5, 10 and 15 years after THR/TKR). Figures 1 and 2 provide a further breakdown of the cumulative incidence of revision for the whole THR and TKR cohorts respectively, with separate incidence curves for categorised BMI (figure 1) and categorised age (figure 2). Gray's test was used to examine whether there were differences in the overall cumulative incidence of revision by gender, categorised age (<55, 55-64, 65-74, 75-84, >85 years) and categorised BMI (<18.5, 18.5-24.9, 25-29.9, 30-39.9, >40 kg/m<sup>2</sup>). All three variables showed statistically significant differences in cumulative incidence for both

10

1  
2  
3 hip (Gray's test statistic: gender, age, BMI,  $p < 0.001$  for all) and knee (Gray's test statistic:  
4  
5 gender, age, BMI,  $p < 0.001$  for all).  
6  
7

8  
9 In a single predictor (univariable) survival model allowing for the competing risk of death  
10 over the entire period of follow-up, we estimated that THR subjects had a 3.0% increase in  
11 the subhazard of revision (SHR: 1.030, 95% CI: 1.020, 1.041,  $p < 0.001$ ) for each extra unit  
12 (kg/m<sup>2</sup>) of BMI, with TKR subjects showing a 2.6% increase per unit (SHR: 1.026, 95% CI:  
13 1.013, 1.038,  $p < 0.001$ ). The subhazard of revision was significantly greater for men  
14 compared to women for both THR (subhazard ratio [SHR]: 1.35, 95% CI: 1.23, 1.48,  
15  $p < 0.001$ ) and TKR 2.0% (SHR: 1.54, 95% CI: 1.37, 1.72,  $p < 0.001$ ). Age at total joint  
16 replacement was also a significant univariable predictor of revision for both hip and knee,  
17 with THR subjects estimated to have a 3% reduction in the subhazard of revision (SHR:  
18 0.970, 95% CI: 0.967, 0.973,  $p < 0.001$ ) for each extra year of age, with TKR subjects showing  
19 a 4.3% reduction (SHR: 0.957, 95% CI: 0.952, 0.961,  $p < 0.001$ ).  
20  
21  
22  
23  
24  
25  
26  
27  
28  
29  
30  
31  
32  
33

34 The effects for all three variables (gender, age and BMI) were then estimated in  
35 multivariable competing risks regression models after adjusting for smoking status,  
36 drinking status and the number of comorbid conditions, again over the entire period of  
37 follow-up. For age, the estimates for the subhazard of revision were almost exactly the  
38 same as those from the univariable model for both hip and knee, but for gender (SHR: 1.23  
39 for hip; 1.51 for knee) and BMI (SHR: 1.020 for hip; 1.015 for knee) the estimates were  
40 smaller. Nevertheless, all three variables remained statistically significant for both hip and  
41 knee in the presence of adjustment. For a five-unit and ten-unit increase in BMI, this  
42 represents an increase in THR revision risk of 10.4% and 21.9% respectively (7.7% and  
43 16.1% for TKR). Testing for two-way interactions between age, gender and BMI did not  
44 produce any significant effects. All subhazard estimates (with 95% confidence intervals and  
45 p-values) from the univariable and multivariable models are given in table 3.  
46  
47  
48  
49  
50  
51  
52  
53  
54  
55  
56  
57  
58  
59  
60

1  
2  
3  
4  
5 To further explore the effect estimates for BMI we ran the same adjusted age-gender-BMI  
6 model described above, but used categorical BMI instead of continuous. For morbidly obese  
7 TKR subjects (BMI 40+) there was a 43.9% increase (95% CI: 2.6%, 103.9%,  $p=0.040$ ) in  
8 the subhazard of revision compared to those with a normal BMI (18.5 to 25), but the effect  
9 for THR was larger (a 65.5% increase) and stronger (95% CI: 15.4%, 137.3%,  $p=0.006$ ).  
10  
11 The effect sizes were similar to those obtained when using the adjusted subhazard ratio  
12 estimate of continuous BMI for a subject with a BMI of 45 relative to one with a BMI of 22  
13 (increase of 57.7% for THR; 40.8% for TKR). For obese patients in the range 30 to 40 kg/m<sup>2</sup>  
14 versus those with a normal BMI, the estimated subhazard ratio for revision was weakly  
15 significant for THR (15.7% increase, 95% CI: 0.2%, 33.7%,  $p=0.048$ ) but not for TKR  
16 (17.9% increase, 95% CI: -1.9%, 41.6%,  $p=0.079$ ).  
17  
18  
19  
20  
21  
22  
23  
24  
25  
26  
27  
28  
29

30 As a sensitivity analysis, we also performed standard Cox regressions with revision surgery as  
31 the event of interest and where no distinction was made between death and other censoring  
32 events. Univariable models for age, gender and BMI gave very similar results to the competing  
33 risks analysis, as did the multivariable models which adjusted for the same factors as in the  
34 competing risks regression. Results from the Cox regression models are given in table 4. In  
35 addition, we calculated that it would take 175 TKR patients to reduce their baseline BMI from  
36 obese to normal in order to prevent one revision operation after 5 years. For THR patients this  
37 number reduces to 152.  
38  
39  
40  
41  
42  
43  
44  
45

46 Finally, we assessed whether the higher incidence of hip revision surgery during the first  
47 year following THR (see figures 1a and 2a) might compromise the proportionality  
48 assumption and therefore suggest the inclusion of time-dependent effects. Separate  
49 univariable piecewise competing risks models for hip revision were fitted for gender, age  
50 ( $\leq 65$  years vs.  $> 65$ ) and BMI ( $> 40$  vs.  $\leq 40$ ). A single changepoint at one year was used  
51 to simultaneously estimate two subhazard ratios for revision (before and after one year  
52  
53  
54  
55  
56  
57  
58  
59  
60

12

1  
2  
3 following THR). The only model which provided some evidence for a different subhazard  
4 ratio during the first year was with BMI (> 40 vs. <= 40) as the predictor (SHR: 2.619, 95%  
5 CI: 1.502, 4.560, p=0.001), but this was not matched with a statistically significant estimate  
6  
7 for revision after the first year (SHR: 0.575, 95% CI: 0.238, 1.170, p=0.130).  
8  
9  
10

## 11 12 13 **DISCUSSION**

14  
15  
16  
17 This study presents population-based estimates for the risk of revision following total joint  
18 replacement of the hip and knee using methods from survival analysis. Cumulative  
19 incidence rates of revision were higher for men than for women and higher for hips than  
20 knees. Age, gender and body mass index were estimated to be significant predictors of time  
21 to revision in an adjusted model allowing for the competing risk of death. Severely obese  
22 patients undergoing total hip replacement were observed to have a higher risk of revision  
23 surgery during the first year following replacement, but the same effect was not observed  
24 for knee replacement.  
25  
26  
27  
28  
29  
30  
31  
32  
33  
34  
35

36 The literature on obesity as a risk factor for hip and knee arthroplasty concentrates mainly  
37 on the risk for primary replacement rather than for revision procedures, and most use rate  
38 differences to estimate relative risk, rather than using time-to-event methods. Many  
39 published studies are small and do not have sufficient power to detect rare outcomes. Often  
40 these studies are locally based and the generalisability to population level is questionable.  
41  
42  
43  
44  
45  
46  
47  
48  
49  
50  
51  
52

53 One of the largest studies examining primary replacement followed up a cohort of over  
54 490,000 middle-aged women over an average of 2.9 years and found increased incidence of  
55 hip and knee replacement in obese subjects(18). Of the studies which consider the effect of  
56  
57  
58  
59  
60



1  
2  
3 obesity on outcomes after primary joint replacement, several focus mainly on events such  
4 as complications arising from surgery(19) or subsequent admission to an intensive care  
5 unit(20), rather than the time to revision surgery. Among studies of other non-revision  
6 outcomes, Andrew *et al*(21) looked at the change in Oxford Hip Score five years after THR  
7 and found no difference between non-obese, obese and morbidly obese patients, but in a  
8 smaller study(22) using Harris Hip Score (HHS) with the same length of follow-up, an  
9 increase in BMI was associated with a small but significant reduction in HHS.  
10  
11  
12  
13  
14  
15  
16  
17  
18  
19

20 An editorial on obesity and joint replacement in 2006(23) suggested that it is those with a  
21 BMI of greater than 40 units (rather than 30) who are at risk of worse outcomes, yet  
22 several subsequent studies have used a BMI cut-point of 30 kg/m<sup>2</sup>. A recent Australian  
23 study of 2026 THR and 535 TKR patients found no difference in mid-term survival rates  
24 between the obese (BMI > 30 kg/m<sup>2</sup>) and non-obese(24). Another study from Switzerland  
25 used Cox regression to estimate the risk of revision in 2495 THRs using the same cut-point  
26 for BMI, estimating a non-significant adjusted hazard ratio for revision of 2.2 (95% CI: 0.9  
27 to 5.3) for obese versus non-obese patients(19). However, a recent Canadian study of 3290  
28 THRs did categorise BMI to include a morbidly obese group (BMI > 40 kg/m<sup>2</sup>) and although  
29 the authors found no difference in time to revision between BMI categories in an  
30 unadjusted analysis, there was a marginally significant difference for septic revisions(25).  
31  
32  
33  
34  
35  
36  
37  
38  
39  
40  
41  
42  
43  
44

45 Our results suggest that there may be a 1.5% to 2% rise in the risk of knee and hip revision  
46 respectively for each extra unit of BMI. However, there is some variation in risk across the  
47 entire range of observed BMI values. For hips, there appears to be very little difference in  
48 BMI-related risk between the normal weight and overweight categories. However, figure 1a  
49 shows that for hips there may be a revision rate of approximately 6% for the morbidly  
50 obese after 10 years, against a 3% rate for the normal and overweight. For knees, figure 1b  
51  
52  
53  
54  
55  
56  
57  
58  
59  
60

14

1  
2  
3 shows a more even distribution across the BMI categories up to about 7 years after TKR,  
4  
5 but with higher risk for the morbidly obese between 7 and 10 years after TKR.  
6  
7

8  
9 Although recommendations(26, 27) to consider the use of the cumulative incidence  
10 function for analysing prosthesis survival are gaining acceptance(28), the use of competing  
11 risks regression to model associated risk factors is still not widely observed. The  
12 justification for using competing risks methods in our primary analysis is that hip and knee  
13 prostheses are mainly implanted in older patients for whom mortality is a substantial  
14 competing risk which may be several times greater than the risk of revision. What is  
15 perhaps surprising is that our results show little difference between the hazard and  
16 subhazard ratio estimates from the Cox and the competing risks regression models  
17 respectively, although the former has a cause-specific interpretation with no distinction  
18 between death and censoring whereas the latter directly models the cumulative incidence  
19 of revision.  
20  
21  
22  
23  
24  
25  
26  
27  
28  
29  
30  
31  
32  
33

#### 34 **Strengths and potential limitations of the study**

35  
36  
37  
38 The strengths of the study data more than make up for its limitations. GPRD data has  
39 individual date-stamped records of patient event data in primary and secondary care  
40 settings, including data on many potential confounders, including comorbidities, BMI,  
41 smoking and drinking. The GPRD practice network covers all of the United Kingdom, and  
42 approximately 5% of all practices are covered by the GPRD. The high degree of  
43 generalisability afforded by this very large sample enables population-level inferences to be  
44 made. Follow-up is long, with several hundred prostheses in the dataset having over 20  
45 years of follow-up without being revised. The choice of the statistical methods used to  
46 allow for the competing risk of death adds a further degree of robustness to the study. The  
47 regression estimates of the hazard ratio for body mass index as a factor associated with  
48  
49  
50  
51  
52  
53  
54  
55  
56  
57  
58  
59  
60

1  
2  
3 revision benefit from a precision which is not usually achievable outside of national  
4 registers, especially for the group of morbidly obese patients within which event rates in  
5 the literature are low.  
6  
7  
8  
9

10  
11 There are several limitations to this work. The revision rate estimates hip and knee at 5  
12 years are close to, but slightly less than those reported by the National Joint Registry, but  
13 the GPRD data used in this study includes prostheses implanted from the late 1980s. Also  
14 our data does not have directly linked information on the indication for surgery, which  
15 would have enabled a sub-analysis by reason for revision. Although certain  
16 indications for revision are more common than others depending on follow-up time (e.g.  
17 infection occurring early), any inferences about indication-specific risks before or after a  
18 given follow-up time would not have been reliable.  
19  
20  
21  
22  
23  
24  
25  
26  
27  
28  
29

### 30 **CONCLUSION**

31  
32 This study has presented estimates of rates and risk factors for revision surgery on hip and  
33 knee prostheses using one of the largest available population-based sets of joint  
34 replacement data outside of national arthroplasty registries. Our estimates suggest that  
35 body mass index is positively associated with the risk of hip and knee revision, but studies  
36 of register data linked with sources of demographic and clinical data are needed in order to  
37 distinguish between effects for specific indications for revision surgery.  
38  
39  
40  
41  
42  
43  
44  
45

### 46 **Acknowledgements**

47  
48 We gratefully acknowledge all the general practitioners and their patients who have  
49 consented to give information to the GPRD along with the MRC support in providing access  
50 to the database.  
51  
52  
53  
54  
55  
56  
57  
58  
59  
60

**Author affiliations**

<sup>1</sup>Faculty of Medicine, University of Southampton, Tremona Road, Southampton. SO16 6YD.

<sup>2</sup>Public Health Sciences and Medical Statistics, Faculty of Medicine, University of Southampton, Tremona Road, Southampton, SO16 6YD.

<sup>3</sup>NIHR Musculoskeletal Biomedical Research Unit, University of Oxford, Nuffield Orthopaedic Centre, Windmill Road, Oxford, OX3 7LD.

<sup>4</sup>MRC Lifecourse Epidemiology Unit, University of Southampton, Southampton General Hospital, SO16 6YB.

**Collaborators** The following people are members of the COAST Study group: Cyrus Cooper, Mark Mullee, James Raftery, Andrew Carr, Andrew Price, Kassim Javaid, David Beard, Douglas Altman, Nicholas Clarke, Jeremy Latham, Sion Glyn-Jones and David Barrett.

**Contributors** All authors were involved in drafting the article or revising it critically for important intellectual content, and all authors approved the final version to be published. Prof. Arden had full access to all of the data in the study and takes responsibility for the integrity of the data and the accuracy of the data analysis.

Study conception and design: Culliford, Judge and Arden.

Acquisition of data: Arden.

Analysis and interpretation of data: Culliford, Maskell, Judge and Arden.

**Funding** This article presents independent research commissioned by the National Institute for Health Research (NIHR) under its Programme Grants for Applied Research funding scheme (RP-PG-0407-10064). The views expressed in this article are those of the author(s) and not necessarily those of the NHS, the NIHR or the Department of Health. Support was also received from the Oxford NIHR Musculoskeletal Biomedical Research Unit, Nuffield Orthopaedic Centre, University of Oxford and the UK Medical Research Council, Medical Research Council Lifecourse Epidemiology Unit, University of Southampton.

**Competing interests** All authors have completed the Unified Competing Interest form at [http://www.icmje.org/coi\\_disclosure.pdf](http://www.icmje.org/coi_disclosure.pdf) (available on request from the corresponding author) and declare that: DJC, JM and AJ have no conflicts of interest; NKA has received consultancy payments, honoraria and

1  
2  
3 consortium research grants, respectively, from: Flexion (PharmaNet), Lilly, Merck Sharp and  
4 Dohme, Q-Med, Roche; Amgen, GSK, NiCox and Smith & Nephew; Novartis, Pfizer, Schering-  
5 Plough and Servier.  
6  
7

8  
9 **Ethics approval** No ethical approval was required for this study.  
10

11  
12 **Provenance and peer review** Not commissioned; externally peer reviewed.  
13

14  
15 **Data sharing statement** No additional data are available.  
16  
17  
18  
19  
20  
21  
22  
23  
24  
25  
26  
27  
28  
29  
30  
31  
32  
33  
34  
35  
36  
37  
38  
39  
40  
41  
42  
43  
44  
45  
46  
47  
48  
49  
50  
51  
52  
53  
54  
55  
56  
57  
58  
59  
60

Table 1 Clinical and Demographic characteristics – all subjects undergoing Total Hip or Knee Replacement

|                                       | Total Hip Replacement<br>(N=63,162) |                    | Total Knee Replacement<br>(N=54,276) |                    |
|---------------------------------------|-------------------------------------|--------------------|--------------------------------------|--------------------|
|                                       | Female<br>(N=39,292)                | Male<br>(N=23,870) | Female<br>(N=31,682)                 | Male<br>(N=22,594) |
| Age (mean, SD)                        | 70.5 (11.1)                         | 67.7 (11.0)        | 70.7 (9.6)                           | 69.4 (9.4)         |
| Gender (%)                            | 62.2                                | 37.8               | 58.3                                 | 41.6               |
| BMI (mean, SD)                        | 27.2 (5.1)                          | 27.7 (4.3)         | 29.6(5.6)                            | 28.8(4.4)          |
| Missing BMI (%)                       | 19.1                                | 19.3               | 13.8                                 | 14.0               |
| Revisions (N, %)                      | 1000 (2.55)                         | 811 (3.40)         | 572 (1.8)                            | 614 (2.7)          |
| Deaths pre-revision<br>(N, %)         | 6615 (16.8)                         | 4201 (17.6)        | 4110(13.0)                           | 3349 (14.8)        |
| Number of comorbid<br>conditions (%): |                                     |                    |                                      |                    |
| 0                                     | 42.8%                               | 48.1%              | 37.5%                                | 43.7%              |
| 1                                     | 34.2%                               | 31.0%              | 37.4%                                | 35.8%              |
| 2+                                    | 23.0%                               | 20.9%              | 25.2%                                | 20.6%              |

Table 2 Cumulative incidence rates for revision surgery at selected times following THR and TKR

| Years since total joint replacement | Hip                                  |                         |                                      |                         | Knee                                 |                         |                                      |                         |
|-------------------------------------|--------------------------------------|-------------------------|--------------------------------------|-------------------------|--------------------------------------|-------------------------|--------------------------------------|-------------------------|
|                                     | Female                               |                         | Male                                 |                         | Female                               |                         | Male                                 |                         |
|                                     | Cumulative incidence of revision (%) | 95% Confidence Interval | Cumulative incidence of revision (%) | 95% Confidence Interval | Cumulative incidence of revision (%) | 95% Confidence Interval | Cumulative incidence of revision (%) | 95% Confidence Interval |
| 1                                   | 0.6                                  | (0.5, 0.6)              | 0.7                                  | (0.6, 0.8)              | 0.3                                  | (0.2, 0.4)              | 0.4                                  | (0.3, 0.5)              |
| 3                                   | 1.2                                  | (1.1, 1.3)              | 1.4                                  | (1.3, 1.6)              | 1.1                                  | (1.0, 1.2)              | 1.5                                  | (1.4, 1.7)              |
| 5                                   | 1.8                                  | (1.7, 2.0)              | 2.2                                  | (2.0, 2.4)              | 1.6                                  | (1.5, 1.8)              | 2.3                                  | (2.1, 2.6)              |
| 10                                  | 3.4                                  | (3.1, 3.6)              | 4.6                                  | (4.3, 5.0)              | 2.8                                  | (2.5, 3.1)              | 4.5                                  | (4.1, 4.9)              |
| 15                                  | 6.0                                  | (5.5, 6.6)              | 8.3                                  | (7.6, 9.1)              | 4.4                                  | (3.9, 5.0)              | 7.1                                  | (6.2, 8.1)              |

Table 3a Estimated subhazard of revision for Total Hip Replacement – Competing risks analysis

|                                                                      | Univariable  |                         |         | Adjusted <sup>a</sup> |                         |         |
|----------------------------------------------------------------------|--------------|-------------------------|---------|-----------------------|-------------------------|---------|
|                                                                      | Hazard ratio | 95% Confidence Interval | p-value | Hazard ratio          | 95% Confidence Interval | p-value |
| <b>BMI<sup>a</sup></b> (kg/m <sup>2</sup> )<br>(per additional unit) | 1.030        | (1.020, 1.041)          | <0.001  | 1.020                 | (1.009, 1.032)          | <0.001  |
| <b>Gender</b>                                                        |              |                         |         |                       |                         |         |
| Female (reference)                                                   | 1.00         |                         |         | 1.00                  |                         |         |
| Male                                                                 | 1.35         | (1.23, 1.48)            | <0.001  | 1.23                  | (1.10, 1.38)            | <0.001  |
| <b>Age</b> (years at THR)<br>(per additional year)                   | 0.970        | (0.967, 0.973)          | <0.001  | 0.971                 | (0.966, 0.975)          | <0.001  |

<sup>a</sup>Adjusted for smoking (Yes/No/Ex), drinking (Yes/No/Ex), number of comorbid conditions

<sup>b</sup>BMI available in 86.1% of patients



Table 3b Estimated subhazard of revision for Total Knee Replacement – Competing risks analysis

|                                                                      | Univariable  |                         |         | Adjusted <sup>a</sup> |                         |         |
|----------------------------------------------------------------------|--------------|-------------------------|---------|-----------------------|-------------------------|---------|
|                                                                      | Hazard ratio | 95% Confidence Interval | p-value | Hazard ratio          | 95% Confidence Interval | p-value |
| <b>BMI<sup>b</sup></b> (kg/m <sup>2</sup> )<br>(per additional unit) | 1.026        | (1.013, 1.038)          | <0.001  | 1.015                 | (1.002, 1.028)          | 0.023   |
| <b>Gender</b>                                                        |              |                         |         |                       |                         |         |
| Female (reference)                                                   | 1.00         |                         |         | 1.00                  |                         |         |
| Male                                                                 | 1.54         | (1.37, 1.72)            | <0.001  | 1.51                  | (1.32, 1.73)            | <0.001  |
| <b>Age</b> (years at THR)<br>(per additional year)                   | 0.957        | (0.952, 0.961)          | <0.001  | 0.957                 | (0.951, 0.962)          | <0.001  |

<sup>a</sup>Adjusted for smoking (Yes/No/Ex), drinking (Yes/No/Ex), number of comorbid conditions

<sup>b</sup>BMI available in 80.9% of patients

Table 4a Estimated hazard of revision for THR– Univariable and adjusted Cox regression analysis with death as a censoring event

|                                                                      | Univariable  |                         |         | Adjusted <sup>a</sup> |                         |         |
|----------------------------------------------------------------------|--------------|-------------------------|---------|-----------------------|-------------------------|---------|
|                                                                      | Hazard ratio | 95% Confidence Interval | p-value | Hazard ratio          | 95% Confidence Interval | p-value |
| <b>BMI<sup>a</sup></b> (kg/m <sup>2</sup> )<br>(per additional unit) | 1.029        | (1.017, 1.040)          | <0.001  | 1.019                 | (1.008, 1.031)          | 0.001   |
| <b>Gender</b>                                                        |              |                         |         |                       |                         |         |
| Female (reference)                                                   | 1.00         |                         |         | 1.00                  |                         |         |
| Male                                                                 | 1.36         | (1.24, 1.29)            | <0.001  | 1.26                  | (1.13, 1.41)            | <0.001  |
| <b>Age</b> (years at THR)<br>(per additional year)                   | 0.978        | (0.974, 0.983)          | <0.001  | 0.977                 | (0.972, 0.982)          | <0.001  |

<sup>a</sup>Adjusted for smoking (Yes/No/Ex), drinking (Yes/No/Ex), number of comorbid conditions

<sup>b</sup>BMI available in 86.1% of patients

Table 4b Estimated hazard of revision for TKR- Univariable and adjusted Cox regression analysis with death as a censoring event

|                                                                      | Univariable  |                         |         | Adjusted <sup>a</sup> |                         |         |
|----------------------------------------------------------------------|--------------|-------------------------|---------|-----------------------|-------------------------|---------|
|                                                                      | Hazard ratio | 95% Confidence Interval | p-value | Hazard ratio          | 95% Confidence Interval | p-value |
| <b>BMI<sup>a</sup></b> (kg/m <sup>2</sup> )<br>(per additional unit) | 1.024        | (1.012, 1.037)          | <0.001  | 1.015                 | (1.003, 1.028)          | 0.019   |
| <b>Gender</b>                                                        |              |                         |         |                       |                         |         |
| Female (reference)                                                   | 1.00         |                         |         | 1.00                  |                         |         |
| Male                                                                 | 1.58         | (1.41, 1.77)            | <0.001  | 1.55                  | (1.36, 1.77)            | <0.001  |
| <b>Age</b> (years at THR)<br>(per additional year)                   | 0.962        | (0.956, 0.967)          | <0.001  | 0.961                 | (0.955, 0.968)          | <0.001  |

<sup>a</sup>Adjusted for smoking (Yes/No/Ex), drinking (Yes/No/Ex), number of comorbid conditions

<sup>b</sup>BMI available in 80.9% of patients

**Figure legends**

Figure 1a Cumulative incidence estimate for revision of THR by body mass index

Figure 1b Cumulative incidence estimate for revision of TKR by body mass index

Figure 2a Cumulative incidence estimate for revision of THR by age

Figure 2b Cumulative incidence estimate for revision of TKR by age

For peer review only

## REFERENCES

1. National Joint Registry for England and Wales: 9th Annual report. 2012.
2. Kurtz S, Mowat F, Ong K, et al. Prevalence of primary and revision total hip and knee arthroplasty in the United States from 1990 through 2002. *The Journal of bone and joint surgery American volume*. 2005;87(7):1487-97. Epub 2005/07/05.
3. Sturmer T, Dreinhofer K, Grober-Gratz D, et al. Differences in the views of orthopaedic surgeons and referring practitioners on the determinants of outcome after total hip replacement. *The Journal of bone and joint surgery British volume*. 2005;87(10):1416-9. Epub 2005/09/29.
4. Santaguida PL, Hawker GA, Hudak PL, et al. Patient characteristics affecting the prognosis of total hip and knee joint arthroplasty: a systematic review. *Canadian journal of surgery Journal canadien de chirurgie*. 2008;51(6):428-36. Epub 2008/12/06.
5. Commissioning Policy Statement: Referral and surgical threshold criteria for elective primary Hip Replacement Surgery. 2011.
6. Clinical threshold: hip replacement for the treatment of joint symptoms and functional limitation. 2011.
7. Commissioning decision: Hip and knee replacement surgery in obese patients (those with a body mass index of 30 or greater) Peninsula Commissioning Priorities Group, 2011.
8. Maradit Kremers H, Visscher SL, Moriarty JP, et al. Determinants of direct medical costs in primary and revision total knee arthroplasty. *Clinical orthopaedics and related research*. 2013;471(1):206-14. Epub 2012/08/07.
9. Vanhegan IS, Malik AK, Jayakumar P, et al. A financial analysis of revision hip arthroplasty: the economic burden in relation to the national tariff. *The Journal of bone and joint surgery British volume*. 2012;94(5):619-23. Epub 2012/04/25.
10. International Society of Arthroplasty Registers. Available from: <http://www.isarhome.org/directory>.
11. Serra-Sutton V, Allepuz A, Espallargues M, et al. Arthroplasty registers: a review of international experiences. *International journal of technology assessment in health care*. 2009;25(1):63-72. Epub 2009/01/08.
12. Kurtz SM, Ong KL, Lau E, et al. International survey of primary and revision total knee replacement. *International orthopaedics*. 2011;35(12):1783-9. Epub 2011/03/16.
13. Jameson SS, Baker PN, Mason J, et al. Independent predictors of revision following metal-on-metal hip resurfacing: a retrospective cohort study using National Joint Registry data. *The Journal of bone and joint surgery British volume*. 2012;94(6):746-54. Epub 2012/05/26.
14. Havelin LI, Robertsson O, Fenstad AM, et al. A Scandinavian experience of register collaboration: the Nordic Arthroplasty Register Association (NARA). *The Journal of bone and joint surgery American volume*. 2011;93 Suppl 3:13-9. Epub 2012/01/25.
15. Parkinson J, Davis S, TP vS. The General Practice Research (GPRD) Database: Now and the Future. In: Mann R, Andrews E, editors. *Pharmacovigilance*. 2nd ed. Chichester, West Sussex, England: John Wiley & Sons, Ltd.; 2007. p. 341-8.
16. Fine JP, Gray RJ. A proportional hazards model for the subdistribution of a competing risk. *J Am Stat Assoc*. 1999;94(446):496-509.
17. Berry SD, Ngo L, Samelson EJ, et al. Competing risk of death: an important consideration in studies of older adults. *Journal of the American Geriatrics Society*. 2010;58(4):783-7. Epub 2010/03/30.
18. Liu B, Balkwill A, Banks E, et al. Relationship of height, weight and body mass index to the risk of hip and knee replacements in middle-aged women. *Rheumatology (Oxford)*. 2007;46(5):861-7. Epub 2007/02/07.
19. Lubbeke A, Stern R, Garavaglia G, et al. Differences in outcomes of obese women and men undergoing primary total hip arthroplasty. *Arthritis and rheumatism*. 2007;57(2):327-34. Epub 2007/03/03.

- 1
- 2
- 3 20. AbdelSalam H, Restrepo C, Tarity TD, et al. Predictors of intensive care unit admission after
- 4 total joint arthroplasty. *The Journal of arthroplasty*. 2012;27(5):720-5. Epub 2011/11/18.
- 5 21. Andrew JG, Palan J, Kurup HV, et al. Obesity in total hip replacement. *The Journal of bone*
- 6 *and joint surgery British volume*. 2008;90(4):424-9. Epub 2008/04/02.
- 7 22. Lubbeke A, Katz JN, Perneger TV, et al. Primary and revision hip arthroplasty: 5-year
- 8 outcomes and influence of age and comorbidity. *The Journal of rheumatology*. 2007;34(2):394-400.
- 9 Epub 2006/12/05.
- 10 23. Horan F. Obesity and joint replacement. *The Journal of bone and joint surgery British*
- 11 *volume*. 2006;88(10):1269-71. Epub 2006/10/03.
- 12 24. Yeung E, Jackson M, Sexton S, et al. The effect of obesity on the outcome of hip and knee
- 13 arthroplasty. *International orthopaedics*. 2011;35(6):929-34. Epub 2010/06/01.
- 14 25. McCalden RW, Charron KD, MacDonald SJ, et al. Does morbid obesity affect the outcome of
- 15 total hip replacement?: an analysis of 3290 THRs. *The Journal of bone and joint surgery British*
- 16 *volume*. 2011;93(3):321-5. Epub 2011/03/02.
- 17 26. Fennema P, Lubsen J. Survival analysis in total joint replacement: an alternative method of
- 18 accounting for the presence of competing risk. *The Journal of bone and joint surgery British volume*.
- 19 2010;92(5):701-6. Epub 2010/05/04.
- 20 27. Ranstam J, Karrholm J, Pulkkinen P, et al. Statistical analysis of arthroplasty data. II.
- 21 Guidelines. *Acta orthopaedica*. 2011;82(3):258-67. Epub 2011/05/31.
- 22 28. Gillam MH, Ryan P, Graves SE, et al. Competing risks survival analysis applied to data from
- 23 the Australian Orthopaedic Association National Joint Replacement Registry. *Acta orthopaedica*.
- 24 2010;81(5):548-55. Epub 2010/10/06.
- 25
- 26
- 27
- 28
- 29
- 30
- 31
- 32
- 33
- 34
- 35
- 36
- 37
- 38
- 39
- 40
- 41
- 42
- 43
- 44
- 45
- 46
- 47
- 48
- 49
- 50
- 51
- 52
- 53
- 54
- 55
- 56
- 57
- 58
- 59
- 60

**A POPULATION-BASED SURVIVAL ANALYSIS DESCRIBING THE ASSOCIATION OF BODY MASS INDEX ON TIME TO REVISION FOR TOTAL HIP AND KNEE REPLACEMENTS: RESULTS FROM THE UK GENERAL PRACTICE RESEARCH DATABASE.**

**STUDY DESIGN:** Population-based study.

**AUTHORS' NAMES AND AFFILIATIONS**

David Culliford (Senior Medical Statistician)<sup>1</sup>

Joe Maskell (Data Manager)<sup>2</sup>

Andy Judge (Senior Medical Statistician)<sup>3,4</sup>

Nigel K Arden (Professor of Rheumatic Diseases and Director)<sup>3,4</sup>  
and the COAST Study group

<sup>1</sup>Faculty of Medicine, University of Southampton, Tremona Road, Southampton. SO16 6YD.

<sup>2</sup>Public Health Sciences and Medical Statistics, Faculty of Medicine, University of Southampton, Tremona Road, Southampton, SO16 6YD.

<sup>3</sup>NIHR Musculoskeletal Biomedical Research Unit, University of Oxford, Nuffield Orthopaedic Centre, Windmill Road, Oxford, OX3 7LD.

<sup>4</sup>MRC Lifecourse Epidemiology Unit, University of Southampton, Southampton General Hospital, SO16 6YB.

2

**ABSTRACT**

**Objectives** Against a backdrop of rising levels of obesity, we describe and estimate associations of body mass index (BMI), age and gender with time to revision for subjects undergoing primary total hip (THR) or knee (TKR) replacement in the UK.

**Design** Population-based cohort study

**Setting** Routinely collected primary care data from a representative sample of general practices, including linked data on all secondary care events.

**Participants** Population-based cohort study of **63,162** THR and **54,276** TKR patients in the UK General Practice Research Database between 1988 and 2011.

**Primary and secondary outcomes** Risk of THR and TKR revision associated with BMI, age and gender, after adjusting for the competing risk of death.

**Results** The five-year cumulative incidence rate for THR was 2.2% for men and 1.8% for women (TKR: 2.3% for men, 1.6% for women). The ~~estimated~~-adjusted overall subhazard ratios for THR patients undergoing subsequent hip revision surgery, with a competing risk of death, were estimated at 1.020 (95% CI: 1.009, 1.032) per additional unit (kg/m<sup>2</sup>) of BMI, 1.23 (95% CI: 1.10, 1.38) for men compared with women and 0.970 (95% CI: 0.967, 0.973) per additional year of age. For TKR patients, the equivalent estimates were 1.015 (95% CI: 1.002, 1.028) for BMI; 1.51 (95% CI: 1.32, 1.73) for gender, and 0.957 (95% CI: 0.951, 0.962) for age. Morbidly obese THR patients had a 65.5% increase (95% CI: 15.4%, 137.3%, p=0.006) in the subhazard of revision versus the normal BMI group (18.5 to 25).



The effect for TKR was smaller (a 43.9% increase) and weaker (95% CI: 2.6%, 103.9%, p=0.040).

**Conclusions** Body mass index is estimated to have a small but statistically significant association with the risk of hip and knee revision, but absolute numbers are small. Further studies are needed in order to distinguish between effects for specific revision surgery indications.

#### WHAT IS ALREADY KNOWN ON THIS TOPIC

Published revision rates for hip and knee replacement already exist, based on UK-based registry data, but follow-up periods are still relatively short.

Some evidence exists that obesity is a risk factor for undergoing primary total hip and knee replacements, but there is little in the literature for the risks of raised BMI on revision surgery.

The recording of BMI prior to primary total hip or knee replacement is less than complete in most national joint registries.

#### WHAT THIS STUDY ADDS

Body mass index is estimated to have a small positive association with the risk of hip and knee revision, after allowing for the competing risk of death.

The elevated risk of revision of the hip in morbidly obese (> 40 kg/m<sup>2</sup>) patients during the first year after primary replacement is not observed in the knee.

It would take 175 TKR patients (152 for THR) to reduce their baseline BMI from obese to normal in order to prevent one revision operation after 5 years.

4

## ARTICLE SUMMARY

### Article focus

- Total joint replacement of the hip (THR) or knee (TKR) is commonly used as an intervention for patients with end-stage osteoarthritis of the lower limb.
- Joint prostheses sometimes require revision surgery and it is important for surgeons, patients and policy makers to understand the risk factors for time to revision.
- Although many studies modelling the time to joint revision have taken over the past 30 years, few such studies have been large-scale, population-based, competing risks analyses.

### Key messages

- These data from the GPRD shows a small but significant association between body mass index and the time to revision for both hip and knee replacement.
- The risk of hip replacement revision for morbidly obese patients was two-thirds higher than for those with normal body mass index.
- The use of competing risks methods produced similar estimates of revision risk to those obtained using relative risks regression methods.

### Strengths and potential limitations of the study

- The large sample size of the GPRD (over 5% of the UK general practice population) enables population-level inferences to be made
- The statistical methods explicitly account for the competing risk of death which has a much higher event rate than the event of interest (THR or TKR) in this patient group.

1  
2  
3  
4  
5  
6  
7  
8  
9  
10  
11  
12  
13  
14  
15  
16  
17  
18  
19  
20  
21  
22  
23  
24  
25  
26  
27  
28  
29  
30  
31  
32  
33  
34  
35  
36  
37  
38  
39  
40  
41  
42  
43  
44  
45  
46  
47  
48  
49  
50  
51  
52  
53  
54  
55  
56  
57  
58  
59  
60

▪ GPRD data does not have directly linked information detailing the reasons for being referred for surgery, so we were unable to establish an exact indication.

## INTRODUCTION

Total joint replacement of the hip and knee are well established as interventions for those suffering with end-stage osteoarthritis (OA) of the lower limb, with OA being the most frequent indication for total hip or knee replacement in the UK(1) (over 90% for hips and over 95% for knees). Yet hip and knee prostheses do not necessarily continue to function effectively for the lifetime of the patient(1, 2). Many traditional metal-on-polyethylene implants are likely to require revision surgery due to wear after 20 years of use due to wear characteristics and peri-prosthetic loosening. As a consequence, elective THR and TKR procedures have until relatively recently been indicated mainly in older patients, but even prostheses which make use of the latest technological developments (*e.g.* unicondylar knee prostheses) are not yet routinely recommended for use in younger patients.

A further dimension is added by the increasing prevalence of obesity in western populations, with clinicians in some cases considering patients too obese to undergo surgery(3, 4), partly due to the perceived increase in risk of both peri- and post-operative complications. There have also been examples of obese and/or morbidly obese patients experiencing restricted access to hip replacement surgery in some parts of the UK(5-7) where local healthcare planners have had similar concerns.

Revision procedures involve a surgical intervention to correct a prosthesis which is not functioning properly. Such operations are more costly than the original replacement procedure(8, 9) and are often more complex, with a higher level of risk to the patient.

Population-based estimates of the time from primary surgery to a revision procedure are of

6

importance to orthopaedic surgeons, rheumatologists, healthcare providers, policymakers and patients. Registry data, both in the U.K.(1) and internationally(10, 11), have been used extensively to estimate time to revision(12). Such data has been used previously to model prosthesis survival time in order to assess which specific demographic, clinical and prosthesis-specific factors are associated with time to failure(13, 14).

Over the 12 months to April 2011, there were over 178,000 total hip and knee replacement operations recorded in the National Joint Registry (NJR) for England and Wales(1). The NJR began recording data in 2003, and although it now contains virtually all replacements carried out in England and Wales, the maximum follow-up is currently less than ten years. However, although the registry contains complete data on many variables, including age and gender, but body mass index is recorded in approximately 61% of subjects undergoing hip replacement (62% for knee). We chose to use data from a primary care database with long follow-up and UK-wide coverage.

The primary aim of this study was to use data from the General Practice Research Database to produce population-based estimates for the association of body mass index, age and gender with the time to revision surgery in the long term following a THR or TKR.

## METHOD

### Participants

We used data from the General Practice Research Database (GPRD). The GPRD comprises the entire computerized medical records of a sample of patients attending general practitioners (GPs) in the UK covering a population of 6.5 million patients from over 600 contributing practices chosen to be representative of the wider UK population(15). GPs in the UK play a key role in the delivery of healthcare by providing primary care and referral

1  
2  
3  
4  
5  
6  
7  
8  
9  
10  
11  
12  
13  
14  
15  
16  
17  
18  
19  
20  
21  
22  
23  
24  
25  
26  
27  
28  
29  
30  
31  
32  
33  
34  
35  
36  
37  
38  
39  
40  
41  
42  
43  
44  
45  
46  
47  
48  
49  
50  
51  
52  
53  
54  
55  
56  
57  
58  
59  
60

to specialist hospital services. Patients are registered with one practice that stores medical information from primary care and hospital attendances. The GPRD has recently become part of the new Clinical Practice Research Datalink (CPRD) which is administered by the Medicines and Healthcare products Regulatory Agency (MHRA).

The GPRD records contain all clinical and referral events in both primary and secondary care in addition to comprehensive demographic information, prescription data, and hospital admissions. Data is stored using Read codes for diseases that are cross-referenced to the International Classification of Diseases (ICD-9). Read codes are used as the standard clinical terminology system within UK primary care. Only practices that pass quality control are used as part of the GPRD database. Deleting or encoding personal and clinic identifiers ensures the confidentiality of information in the GPRD. The GPRD comprises entire general practice populations rather than probability-based samples of patients.

We identified all patients in the database with a diagnosis code for total hip or knee arthroplasty from the beginning of 1991 until August 2011. We then identified any secondary (revision) hip or knee operations for these patients which occurred subsequent to the primary operation. [The list of Read codes used to identify the primary and revision operations were independently reviewed by different clinicians and a consensus list agreed between them.](#) Deaths recorded within the GPRD were also identified. The date of the first incidence of a subject's hip or knee replacement was used as the start time. The event of interest in all time-to-event models was the first recorded revision operation. Censoring events were the end of study date (11<sup>th</sup> August 2011) or the transfer of a patient out of the GPRD for any reason other than death. Death from any cause was treated as a competing risk in the primary analysis. Patients were included in the analysis if aged 18 years or over at the time of the replacement operation. Participant demographics including age, gender,

1  
2  
3  
4  
5  
6  
7  
8  
9  
10  
11  
12  
13  
14  
15  
16  
17  
18  
19  
20  
21  
22  
23  
24  
25  
26  
27  
28  
29  
30  
31  
32  
33  
34  
35  
36  
37  
38  
39  
40  
41  
42  
43  
44  
45  
46  
47  
48  
49  
50  
51  
52  
53  
54  
55  
56  
57  
58  
59  
60

8  
| pre-operative body mass index (BMI), smoking and drinking status were collated, in addition to information on comorbid conditions.

### Analysis

We used the competing risks regression methods of Fine and Gray(16) to estimate the effects of a subject's body mass index (BMI), age and gender on the time to revision of a prosthesis implanted during a THR or TKR operation. The substantive event of interest was the first incidence of revision surgery, with all-cause mortality separately identified as a competing risk. The rationale for using competing risks regression is that methods which treat death as just another censoring event may overestimate risk for an event of interest, especially in an older population(17). We adjusted for a range of important covariates and potential confounders: smoking status, alcohol consumption and the number of comorbid conditions (which include diabetes, hypertension, stroke, cardiovascular disease and anaemia). All covariates were treated as fixed at baseline. Analyses for hips and knees were performed separately, with prosthesis survival at the end of follow-up being of primary interest. Proportionality of hazards assumptions was assessed by examining complementary log-log plots of the cumulative incidence. As a sensitivity analysis we modelled the same data using standard methods which do not cater for competing risks (*i.e.* Cox regression analysis with death as a censoring event). We also calculated stand-alone estimates for the cumulative incidence of revision surgery at 1, 5, 10 and 15 years, and plotted estimates of the age-, gender- and BMI-specific cumulative incidence curves for the whole cohort.

All tests of significance were at the 5% level and two-sided. Interval estimates were based on 95% confidence intervals. The main statistical analysis was carried out using R (R Core Team, 2012. R Foundation for Statistical Computing, Vienna, Austria), SAS version 9.2 (SAS

Institute Inc., Cary, NC) and Stata (StataCorp. 2011. Stata Statistical Software: Release 12. College Station, TX).

## RESULTS

### Participant demographics

Over the study period the database contained 63,162 patients undergoing total hip replacement and 54,276 patients undergoing total knee replacement. The average age at replacement was similar in both the THR and the TKR groups but the proportion of women was greater for both THR and TKR (table 1). For those with a recorded pre-operative BMI, the proportion of obese subjects (BMI  $\geq 30$  kg/m<sup>2</sup>) was 26.2% for THR and 39.8% for TKR and the proportion of morbidly obese subjects (which we define as having a BMI  $\geq 40$  kg/m<sup>2</sup>) was 1.6% for THR and 3.6% for TKR. Eighty percent of pre-operative BMI values used were recorded within five years of the primary operation. Table 1 describes the baseline characteristics of the cohort, including summary statistics and missing data percentages for all explanatory variables where complete data was not observed.

### Survival analysis

The estimated cumulative incidence of revision at five years was 2.0% (95% CI: 1.8, 2.1) for THR and 1.9% (95% CI: 1.8, 2.1) for TKR. For women, cumulative incidence at five years was 1.8% (95% CI: 1.7, 2.0) for THR and 1.6% (95% CI: 1.5, 1.8) for TKR, and for men 2.2% (95% CI: 2.0, 2.4) and 2.3% (95% CI: 2.1, 2.6) respectively. Table 2 provides gender-specific estimates of cumulative incidence with point-wise confidence intervals for a range of times (1, 3, 5, 10 and 15 years after THR/TKR). Figures 1 and 2 provide a further breakdown of the cumulative incidence of revision for the whole THR and TKR cohorts respectively, with separate incidence curves for categorised BMI (figure 1) and categorised

1  
2  
3  
4  
5  
6  
7  
8  
9  
10  
11  
12  
13  
14  
15  
16  
17  
18  
19  
20  
21  
22  
23  
24  
25  
26  
27  
28  
29  
30  
31  
32  
33  
34  
35  
36  
37  
38  
39  
40  
41  
42  
43  
44  
45  
46  
47  
48  
49  
50  
51  
52  
53  
54  
55  
56  
57  
58  
59  
60

10

age (figure 2). Gray's test was used to examine whether there were ~~overall~~ differences in the overall cumulative incidence of revision by gender, categorised age (<55, 55-64, 65-74, 75-84, >85 years) and categorised BMI (<18.5, 18.5-24.9, 25-29.9, 30-39.9, >40 kg/m<sup>2</sup>). All three variables showed statistically significant differences in cumulative incidence for both hip (Gray's test statistic: gender, age, BMI, p<0.001 for all) and knee (Gray's test statistic: gender, age, BMI, p<0.001 for all).

In a single predictor (univariable) survival model allowing for the competing risk of death over the entire period of follow-up, we estimated that THR subjects had a 3.0% increase in the subhazard of revision (SHR: 1.030, 95% CI: 1.020, 1.041, p<0.001) for each extra unit (kg/m<sup>2</sup>) of BMI, with TKR subjects showing a 2.6% increase per unit (SHR: 1.026, 95% CI: 1.013, 1.038, p<0.001). ~~found that t~~The subhazard of revision was significantly greater for men compared to women for both THR (subhazard ratio [SHR]: 1.35, 95% CI: 1.23, 1.48, p<0.001) and TKR 2.0% (SHR: 1.54, 95% CI: 1.37, 1.72, p<0.001). Age at total joint replacement was also a significant univariable predictor of revision for both hip and knee, with THR subjects estimated to have a 3% reduction in the subhazard of revision (SHR: 0.970, 95% CI: 0.967, 0.973, p<0.001) for each extra year of age, with TKR subjects showing a 4.3% reduction (SHR: 0.957, 95% CI: 0.952, 0.961, p<0.001). ~~The univariable model for body mass index estimated that THR subjects had a 3.0% increase in the subhazard of revision (SHR: 1.030, 95% CI: 1.020, 1.041, p<0.001) for each extra unit (kg/m<sup>2</sup>) of BMI, with TKR subjects showing a 2.6% increase per unit (SHR: 1.026, 95% CI: 1.013, 1.038, p<0.001).~~

The effects for all three variables (gender, age and BMI) were then estimated in multivariable competing risks regression models after adjusting for smoking status, drinking status and the number of comorbid conditions, again over the entire period of follow-up. For age, the estimates for the subhazard of revision were almost exactly the



1  
2  
3  
4  
5  
6  
7  
8  
9  
10  
11  
12  
13  
14  
15  
16  
17  
18  
19  
20  
21  
22  
23  
24  
25  
26  
27  
28  
29  
30  
31  
32  
33  
34  
35  
36  
37  
38  
39  
40  
41  
42  
43  
44  
45  
46  
47  
48  
49  
50  
51  
52  
53  
54  
55  
56  
57  
58  
59  
60

same as those from the univariable model for both hip and knee, but for gender (SHR: 1.23 for hip; 1.51 for knee) and BMI (SHR: 1.020 for hip; 1.015 for knee) the estimates were smaller. Nevertheless, all three variables remained statistically significant for both hip and knee in the presence of adjustment. For a five-unit and ten-unit increase in BMI, this represents an increase in THR revision risk of 10.4% and 21.9% respectively (7.7% and 16.1% for TKR). Testing for two-way interactions between age, gender and BMI did not produce any significant effects. All subhazard estimates (with 95% confidence intervals and p-values) from the univariable and multivariable models are given in table 3.

To further explore the effect estimates for BMI we ran the same adjusted age-gender-BMI model described above, but used categorical BMI instead of continuous. For morbidly obese TKR subjects (BMI 40+) there was a 43.9% increase (95% CI: 2.6%, 103.9%, p=0.040) in the subhazard of revision compared to those with a normal BMI (18.5 to 25), but the effect for THR was larger (a 65.5% increase) and stronger (95% CI: 15.4%, 137.3%, p=0.006). The effect sizes were similar to those obtained when using the adjusted subhazard ratio estimate of continuous BMI for a subject with a BMI of 45 relative to one with a BMI of 22 (increase of 57.7% for THR; 40.8% for TKR). For obese patients in the range 30 to 40 kg/m<sup>2</sup> versus those with a normal BMI, the estimated subhazard ratio for revision was weakly significant for THR (15.7% increase, 95% CI: 0.2%, 33.7%, p=0.048) but not for TKR (17.9% increase, 95% CI: -1.9%, 41.6%, p=0.079).

As a sensitivity analysis, we also performed standard Cox regressions with revision surgery as the event of interest and where no distinction was made between death and other censoring events. Univariable models for age, gender and BMI gave very similar results to the competing risks analysis, as did the multivariable models which adjusted for the same factors as in the competing risks regression. Results from the Cox regression models are given in table 4. In addition, we calculated that it would take 175 TKR patients to reduce

12

their baseline BMI from obese to normal in order to prevent one revision operation after 5 years. For THR patients this number reduces to 152.

Finally, we assessed whether the higher incidence of hip revision surgery during the first year following THR (see figures 1a and 2a) might compromise the proportionality assumption and therefore suggest the inclusion of time-dependent effects. Separate univariable piecewise competing risks models for hip revision were fitted for gender, age ( $\leq 65$  years vs.  $> 65$ ) and BMI ( $> 40$  vs.  $\leq 40$ ). A single changepoint at one year was used to simultaneously estimate two subhazard ratios for revision (before and after one year following THR). The only model which provided some evidence for a different subhazard ratio during the first year was with BMI ( $> 40$  vs.  $\leq 40$ ) as the predictor (SHR: 2.619, 95% CI: 1.502, 4.560,  $p=0.001$ ), but this was not matched with a statistically significant estimate for revision after the first year (SHR: 0.575, 95% CI: 0.238, 1.170,  $p=0.130$ ).

## DISCUSSION

This study presents population-based estimates for the risk of revision following total joint replacement of the hip and knee using methods from survival analysis. Cumulative incidence rates of revision were higher for men than for women and higher for hips than knees. Age, gender and body mass index were estimated to be significant predictors of time to revision in an adjusted model allowing for the competing risk of death. Severely obese patients undergoing total hip replacement were observed to have a higher risk of revision surgery during the first year following replacement, but the same effect was not observed for knee replacement.

The literature on obesity as a risk factor for hip and knee arthroplasty concentrates mainly on the risk for primary replacement rather than for revision procedures, and most use rate

Formatted: Indent: Left: 0", First line: 0"

1  
2  
3  
4  
5  
6  
7 differences to estimate relative risk, rather than using time-to-event methods. Many  
8 published studies are small and do not have sufficient power to detect rare outcomes. Often  
9 these studies are locally based and the generalisability to population level is questionable.  
10 Mostly results are presented for categorised BMI, which is often dichotomised at 30 kg/m<sup>2</sup>,  
11 and where results for the morbidly obese are reported, the sample size is small.  
12  
13  
14

15  
16  
17 One of the largest studies examining primary replacement followed up a cohort of over  
18 490,000 middle-aged women over an average of 2.9 years and found increased incidence of  
19 hip and knee replacement in obese subjects(18). Of the studies which consider the effect of  
20 obesity on outcomes after primary joint replacement, several focus mainly on events such  
21 as complications arising from surgery(19) or subsequent admission to an intensive care  
22 unit(20), rather than the time to revision surgery. Among studies of other non-revision  
23 outcomes, Andrew *et al*(21) looked at the change in Oxford Hip Score five years after THR  
24 and found no difference between non-obese, obese and morbidly obese patients, but in a  
25 smaller study(22) using Harris Hip Score (HHS) with the same length of follow-up, an  
26 increase in BMI was associated with a small but significant reduction in HHS.  
27  
28  
29  
30  
31  
32  
33  
34  
35  
36

37 An editorial on obesity and joint replacement in 2006(23) suggested that it is those with a  
38 BMI of greater than 40 units (rather than 30) who are at risk of worse outcomes, yet  
39 several subsequent studies have used a BMI cut-point of 30 kg/m<sup>2</sup>. A recent Australian  
40 study of 2026 THR and 535 TKR patients found no difference in mid-term survival rates  
41 between the obese (BMI > 30 kg/m<sup>2</sup>) and non-obese(24). Another study from Switzerland  
42 used Cox regression to estimate the risk of revision in 2495 THRs using the same cut-point  
43 for BMI, estimating a non-significant adjusted hazard ratio for revision of 2.2 (95% CI: 0.9  
44 to 5.3) for obese versus non-obese patients(19). However, a recent Canadian study of 3290  
45 THRs did categorise BMI to include a morbidly obese group (BMI > 40 kg/m<sup>2</sup>) and although  
46  
47  
48  
49  
50  
51  
52  
53  
54  
55  
56  
57  
58  
59  
60

1  
2  
3  
4 14  
5  
6  
7  
8  
9

the authors found no difference in time to revision between BMI categories in an unadjusted analysis, there was a marginally significant difference for septic revisions(25).

10  
11  
12 Our results suggest that there may be a 1.5% to 2% rise in the risk of knee and hip revision  
13 respectively for each extra unit of BMI. However, there is some variation in risk across the  
14 entire range of observed BMI values. For hips, there appears to be very little difference in  
15 BMI-related risk between the normal weight and overweight categories. However, figure 1a  
16 shows that for hips there may be a revision rate of approximately 6% for the morbidly  
17 obese after 10 years, against a 3% rate for the normal and overweight. For knees, figure 1b  
18 shows a more even distribution across the BMI categories up to about 7 years after TKR,  
19 but with higher risk for the morbidly obese between 7 and 10 years after TKR.  
20  
21  
22  
23  
24  
25  
26  
27

28 Although recommendations(26, 27) to consider the use of the cumulative incidence  
29 function for analysing prosthesis survival are gaining acceptance(28), the use of competing  
30 risks regression to model associated risk factors is still not widely observed. The  
31 justification for using competing risks methods in our primary analysis is that hip and knee  
32 prostheses are mainly implanted in older patients for whom mortality is a substantial  
33 competing risk which may be several times greater than the risk of revision. What is  
34 perhaps surprising is that our results show little difference between the hazard and  
35 subhazard ratio estimates from the Cox and the competing risks regression models  
36 respectively, although the former has a cause-specific interpretation with no distinction  
37 between death and censoring whereas the latter directly models the cumulative incidence  
38 of revision.  
39  
40  
41  
42  
43  
44  
45  
46  
47  
48  
49

#### 50 **Strengths and potential limitations of the study**

51  
52  
53  
54  
55  
56  
57  
58  
59  
60

1  
2  
3  
4  
5  
6  
7 The strengths of the study data more than make up for its limitations. GPRD data has  
8 individual date-stamped records of patient event data in primary and secondary care  
9 settings, including data on many potential confounders, including comorbidities, BMI,  
10 smoking and drinking. The GPRD practice network covers all of the United Kingdom, and  
11 approximately 5% of all practices are covered by the GPRD. The high degree of  
12 generalisability afforded by this very large sample enables population-level inferences to be  
13 made. Follow-up is long, with several hundred prostheses in the dataset having over 20  
14 years of follow-up without being revised. The choice of the statistical methods used to  
15 allow for the competing risk of death adds a further degree of robustness to the study. The  
16 regression estimates of the hazard ratio for body mass index as a factor associated with  
17 revision benefit from a precision which is not usually achievable outside of national  
18 registers, especially for the group of morbidly obese patients within which event rates in  
19 the literature are low.  
20  
21  
22  
23  
24  
25  
26  
27  
28  
29  
30  
31

32 There are several limitations to this work. The revision rate estimates hip and knee at 5  
33 years are close to, but slightly less than those reported by the National Joint Registry, but  
34 the GPRD data used in this study includes prostheses implanted from the late 1980s. Also  
35 our data does not have directly linked information on the indication for surgery, which  
36 would have been enabled a sub-analysis by reason for revision. Although certain  
37 indications for revision are more common than others depending on follow-up time (e.g.  
38 infection occurring early), any inferences about indication-specific risks before or after a  
39 given follow-up time would not have been reliable.  
40  
41  
42  
43  
44  
45  
46  
47

## 48 CONCLUSION

49 This study has presented estimates of rates and risk factors for revision surgery on hip and  
50 knee prostheses using one of the largest available population-based sets of joint  
51 replacement data outside of national arthroplasty registries. Our estimates suggest that  
52  
53  
54  
55  
56  
57  
58  
59  
60

1  
2  
3  
4 16  
5  
6

7 body mass index is positively associated with the risk of hip and knee revision, but studies  
8 of register data linked with sources of demographic and clinical data are needed in order to  
9 distinguish between effects for specific indications for revision surgery.  
10  
11

#### 12 13 **Acknowledgements**

14 We gratefully acknowledge all the general practitioners and their patients who have  
15 consented to give information to the GPRD along with the MRC support in providing access  
16 to the database.  
17  
18  
19  
20  
21  
22  
23  
24  
25  
26  
27  
28  
29  
30  
31  
32  
33  
34  
35  
36  
37  
38  
39  
40  
41  
42  
43  
44  
45  
46  
47  
48  
49  
50  
51  
52  
53  
54  
55  
56  
57  
58  
59  
60

**Author affiliations**

<sup>1</sup>Faculty of Medicine, University of Southampton, Tremona Road, Southampton. SO16 6YD.

<sup>2</sup>Public Health Sciences and Medical Statistics, Faculty of Medicine, University of Southampton, Tremona Road, Southampton, SO16 6YD.

<sup>3</sup>NIHR Musculoskeletal Biomedical Research Unit, University of Oxford, Nuffield Orthopaedic Centre, Windmill Road, Oxford, OX3 7LD.

<sup>4</sup>MRC Lifecourse Epidemiology Unit, University of Southampton, Southampton General Hospital, SO16 6YB.

**Collaborators** The following people are members of the COAST Study group: Cyrus Cooper, Mark Mullee, James Raftery, Andrew Carr, Andrew Price, Kassim Javaid, David Beard, Douglas Altman, Nicholas Clarke, Jeremy Latham, Sion Glyn-Jones and David Barrett.

**Contributors** DJC, JM, AJ and NKA were involved in:

(1) substantial contributions to conception and design, analysis and interpretation of data; (2) drafting the article or revising it critically for important intellectual content and (3) final approval of the version to be published.

**Funding** This article presents independent research commissioned by the National Institute for Health Research (NIHR) under its Programme Grants for Applied Research funding scheme (RP-PG-0407-10064). The views expressed in this article are those of the author(s) and not necessarily those of the NHS, the NIHR or the Department of Health. Support was also received from the Oxford NIHR Musculoskeletal Biomedical Research Unit, Nuffield Orthopaedic Centre, University of Oxford and the UK Medical Research Council, Medical Research Council Lifecourse Epidemiology Unit, University of Southampton.

**Competing interests** All authors have completed the Unified Competing Interest form at [http://www.icmje.org/coi\\_disclosure.pdf](http://www.icmje.org/coi_disclosure.pdf) (available on request from the corresponding author) and declare that: DJC, JM and AJ have no conflicts of interest; NKA has received consultancy payments, honoraria and consortium research grants, respectively, from: Flexion (PharmaNet), Lilly, Merck Sharp and Dohme, Q-Med, Roche; Amgen, GSK, NiCox and Smith & Nephew; Novartis, Pfizer, Schering-Plough and Servier.

1  
2  
3  
4 18  
5  
6

7 **Ethics approval** No ethical approval was required for this study.  
8  
9

10 **Provenance and peer review** Not commissioned; externally peer reviewed.  
11

12 **Data sharing statement** No additional data are available.  
13  
14  
15  
16  
17  
18  
19  
20  
21  
22  
23  
24  
25  
26  
27  
28  
29  
30  
31  
32  
33  
34  
35  
36  
37  
38  
39  
40  
41  
42  
43  
44  
45  
46  
47  
48  
49  
50  
51  
52  
53  
54  
55  
56  
57  
58  
59  
60

For peer review only



Table 1 Clinical and Demographic characteristics – all subjects undergoing Total Hip or Knee Replacement

|                                       | Total Hip Replacement<br>(N=63,162) |                    | Total Knee Replacement<br>(N=54,276) |                    |
|---------------------------------------|-------------------------------------|--------------------|--------------------------------------|--------------------|
|                                       | Female<br>(N=39,292)                | Male<br>(N=23,870) | Female<br>(N=31,682)                 | Male<br>(N=22,594) |
| Age (mean, SD)                        | 70.5 (11.1)                         | 67.7 (11.0)        | 70.7 (9.6)                           | 69.4 (9.4)         |
| Gender (%)                            | 62.2                                | 37.8               | 58.3                                 | 41.6               |
| BMI (mean, SD)                        | 27.2 (5.1)                          | 27.7 (4.3)         | 29.6(5.6)                            | 28.8(4.4)          |
| Missing BMI (%)                       | 19.1                                | 19.3               | 13.8                                 | 14.0               |
| Revisions (N, %)                      | 1000 (2.55)                         | 811 (3.40)         | 572 (1.8)                            | 614 (2.7)          |
| Deaths pre-revision<br>(N, %)         | 6615 (16.8)                         | 4201 (17.6)        | 4110(13.0)                           | 3349 (14.8)        |
| Number of comorbid<br>conditions (%): |                                     |                    |                                      |                    |
| 0                                     | 42.8%                               | 48.1%              | 37.5%                                | 43.7%              |
| 1                                     | 34.2%                               | 31.0%              | 37.4%                                | 35.8%              |
| 2+                                    | 23.0%                               | 20.9%              | 25.2%                                | 20.6%              |

20

Table 2 Cumulative incidence rates for revision surgery at selected times following THR and TKR

| Years since<br>total joint<br>replacement | Hip                                        |                               |                                            |                               | Knee                                       |                               |                                            |                               |
|-------------------------------------------|--------------------------------------------|-------------------------------|--------------------------------------------|-------------------------------|--------------------------------------------|-------------------------------|--------------------------------------------|-------------------------------|
|                                           | Female                                     |                               | Male                                       |                               | Female                                     |                               | Male                                       |                               |
|                                           | Cumulative<br>incidence of<br>revision (%) | 95%<br>Confidence<br>Interval |
| 1                                         | 0.6                                        | (0.5, 0.6)                    | 0.7                                        | (0.6, 0.8)                    | 0.3                                        | (0.2, 0.4)                    | 0.4                                        | (0.3, 0.5)                    |
| 3                                         | 1.2                                        | (1.1, 1.3)                    | 1.4                                        | (1.3, 1.6)                    | 1.1                                        | (1.0, 1.2)                    | 1.5                                        | (1.4, 1.7)                    |
| 5                                         | 1.8                                        | (1.7, 2.0)                    | 2.2                                        | (2.0, 2.4)                    | 1.6                                        | (1.5, 1.8)                    | 2.3                                        | (2.1, 2.6)                    |
| 10                                        | 3.4                                        | (3.1, 3.6)                    | 4.6                                        | (4.3, 5.0)                    | 2.8                                        | (2.5, 3.1)                    | 4.5                                        | (4.1, 4.9)                    |
| 15                                        | 6.0                                        | (5.5, 6.6)                    | 8.3                                        | (7.6, 9.1)                    | 4.4                                        | (3.9, 5.0)                    | 7.1                                        | (6.2, 8.1)                    |

Table 3a Estimated subhazard of revision for Total Hip Replacement – Competing risks analysis

|                                                                                                  | Univariable             |                                  |                             | Adjusted <sup>a</sup>   |                                  |                             |
|--------------------------------------------------------------------------------------------------|-------------------------|----------------------------------|-----------------------------|-------------------------|----------------------------------|-----------------------------|
|                                                                                                  | Hazard ratio            | 95% Confidence Interval          | p-value                     | Hazard ratio            | 95% Confidence Interval          | p-value                     |
| <b>BMI<sup>b</sup> (kg/m<sup>2</sup>)</b><br><b>—(per additional unit)</b>                       | <b>1.030</b>            | <b>(1.020, 1.041)</b>            | <b>&lt;0.001</b>            | <b>1.020</b>            | <b>(1.009, 1.032)</b>            | <b>&lt;0.001</b>            |
| <b>Gender</b>                                                                                    |                         |                                  |                             |                         |                                  |                             |
| Female (reference)                                                                               | 1.00                    |                                  |                             | 1.00                    |                                  | <0.001                      |
| Male                                                                                             | 1.35                    | (1.23, 1.48)                     | <0.001                      | 1.23                    | (1.10, 1.38)                     | <0.001                      |
| <b>Age (years at THR)</b><br><b>(per additional year)</b>                                        | 0.970                   | (0.967, 0.973)                   | <0.001                      | 0.971                   | (0.966, 0.975)                   | <0.001                      |
| <del><b>BMI<sup>b</sup> (kg/m<sup>2</sup>)</b></del><br><del><b>—(per additional unit)</b></del> | <del><b>1.030</b></del> | <del><b>(1.020, 1.041)</b></del> | <del><b>&lt;0.001</b></del> | <del><b>1.020</b></del> | <del><b>(1.009, 1.032)</b></del> | <del><b>&lt;0.001</b></del> |

<sup>a</sup>Adjusted for smoking (Yes/No/Ex), drinking (Yes/No/Ex), number of comorbid conditions

<sup>b</sup>BMI available in 86.1% of patients

22

Table 3b Estimated subhazard of revision for Total Knee Replacement – Competing risks analysis

|                                                                            | Univariable  |                         |                  | Adjusted <sup>a</sup> |                         |              |
|----------------------------------------------------------------------------|--------------|-------------------------|------------------|-----------------------|-------------------------|--------------|
|                                                                            | Hazard ratio | 95% Confidence Interval | p-value          | Hazard ratio          | 95% Confidence Interval | p-value      |
| <b>BMI<sup>b</sup> (kg/m<sup>2</sup>)</b><br><b>—(per additional unit)</b> | <b>1.026</b> | <b>(1.013, 1.038)</b>   | <b>&lt;0.001</b> | <b>1.015</b>          | <b>(1.002, 1.028)</b>   | <b>0.023</b> |
| <b>Gender</b>                                                              |              |                         |                  |                       |                         |              |
| Female (reference)                                                         | 1.00         |                         |                  | 1.00                  |                         | <0.001       |
| Male                                                                       | 1.54         | (1.37, 1.72)            | <0.001           | 1.51                  | (1.32, 1.73)            | <0.001       |
| <b>Age (years at THR)</b><br><b>(per additional year)</b>                  | 0.957        | (0.952, 0.961)          | <0.001           | 0.957                 | (0.951, 0.962)          | <0.001       |
| <b>BMI<sup>b</sup> (kg/m<sup>2</sup>)</b><br><b>—(per additional unit)</b> | <b>1.026</b> | <b>(1.013, 1.038)</b>   | <b>&lt;0.001</b> | <b>1.015</b>          | <b>(1.002, 1.028)</b>   | <b>0.023</b> |

<sup>a</sup>Adjusted for smoking (Yes/No/Ex), drinking (Yes/No/Ex), number of comorbid conditions

<sup>b</sup>BMI available in 80.9% of patients

Table 4a Estimated hazard of revision for THR– Univariable and adjusted Cox regression analysis with death as a censoring event

|                                                                            | Univariable  |                         |                  | Adjusted <sup>a</sup> |                         |              |
|----------------------------------------------------------------------------|--------------|-------------------------|------------------|-----------------------|-------------------------|--------------|
|                                                                            | Hazard ratio | 95% Confidence Interval | p-value          | Hazard ratio          | 95% Confidence Interval | p-value      |
| <b>BMI<sup>b</sup> (kg/m<sup>2</sup>)</b><br><b>—(per additional unit)</b> | <b>1.029</b> | <b>(1.017, 1.040)</b>   | <b>&lt;0.001</b> | <b>1.019</b>          | <b>(1.008, 1.031)</b>   | <b>0.001</b> |
| <b>Gender</b>                                                              |              |                         |                  |                       |                         |              |
| Female (reference)                                                         | 1.00         |                         |                  | 1.00                  |                         | <0.001       |
| Male                                                                       | 1.36         | (1.24, 1.29)            | <0.001           | 1.26                  | (1.13, 1.41)            | <0.001       |
| <b>Age (years at THR)</b><br><b>(per additional year)</b>                  | 0.978        | (0.974, 0.983)          | <0.001           | 0.977                 | (0.972, 0.982)          | <0.001       |
| <b>BMI<sup>b</sup> (kg/m<sup>2</sup>)</b><br><b>—(per additional unit)</b> | <b>1.029</b> | <b>(1.017, 1.040)</b>   | <b>&lt;0.001</b> | <b>1.019</b>          | <b>(1.008, 1.031)</b>   | <b>0.001</b> |

<sup>a</sup>Adjusted for smoking (Yes/No/Ex), drinking (Yes/No/Ex), number of comorbid conditions

<sup>b</sup>BMI available in 86.1% of patients

24

Table 4b Estimated hazard of revision for TKR– Univariable and adjusted Cox regression analysis with death as a censoring event

|                                                                            | Univariable  |                         |                  | Adjusted <sup>a</sup> |                         |              |
|----------------------------------------------------------------------------|--------------|-------------------------|------------------|-----------------------|-------------------------|--------------|
|                                                                            | Hazard ratio | 95% Confidence Interval | p-value          | Hazard ratio          | 95% Confidence Interval | p-value      |
| <b>BMI<sup>b</sup> (kg/m<sup>2</sup>)</b><br><b>—(per additional unit)</b> | <b>1.024</b> | <b>(1.012, 1.037)</b>   | <b>&lt;0.001</b> | <b>1.015</b>          | <b>(1.003, 1.028)</b>   | <b>0.019</b> |
| <b>Gender</b>                                                              |              |                         |                  |                       |                         |              |
| Female (reference)                                                         | 1.00         |                         |                  | 1.00                  |                         | <0.001       |
| Male                                                                       | 1.58         | (1.41, 1.77)            | <0.001           | 1.55                  | (1.36, 1.77)            | <0.001       |
| <b>Age (years at THR)</b><br><b>(per additional year)</b>                  | 0.962        | (0.956, 0.967)          | <0.001           | 0.961                 | (0.955, 0.968)          | <0.001       |
| <b>BMI<sup>b</sup> (kg/m<sup>2</sup>)</b><br><b>—(per additional unit)</b> | <b>1.024</b> | <b>(1.012, 1.037)</b>   | <b>&lt;0.001</b> | <b>1.015</b>          | <b>(1.003, 1.028)</b>   | <b>0.019</b> |

<sup>a</sup>Adjusted for smoking (Yes/No/Ex), drinking (Yes/No/Ex), number of comorbid conditions

<sup>b</sup>BMI available in 80.9% of patients

Figure 1a Cumulative incidence estimate for revision of THR by body mass index

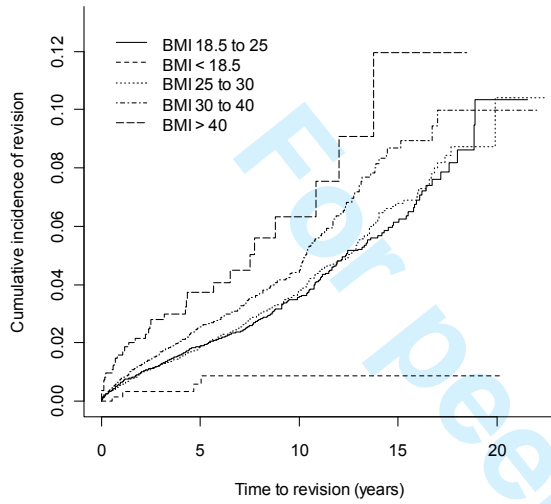

Figure 1b Cumulative incidence estimate for revision of TKR by body mass index

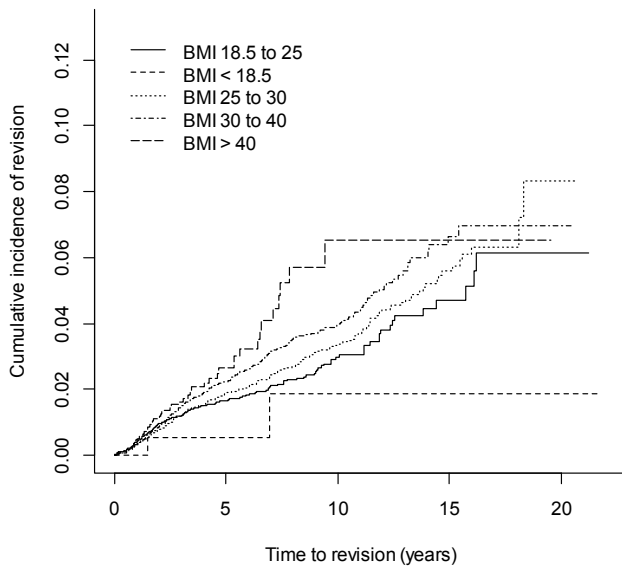

26

Figure 2a Cumulative incidence estimate for revision of THR by age

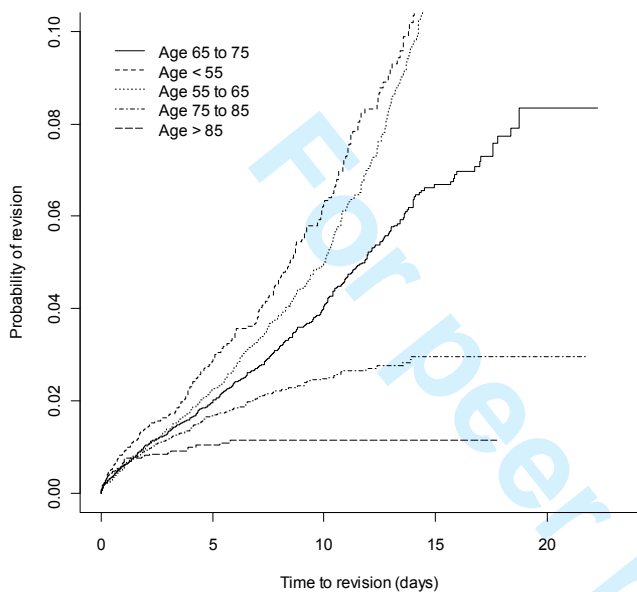

Figure 2b Cumulative incidence estimate for revision of TKR by age

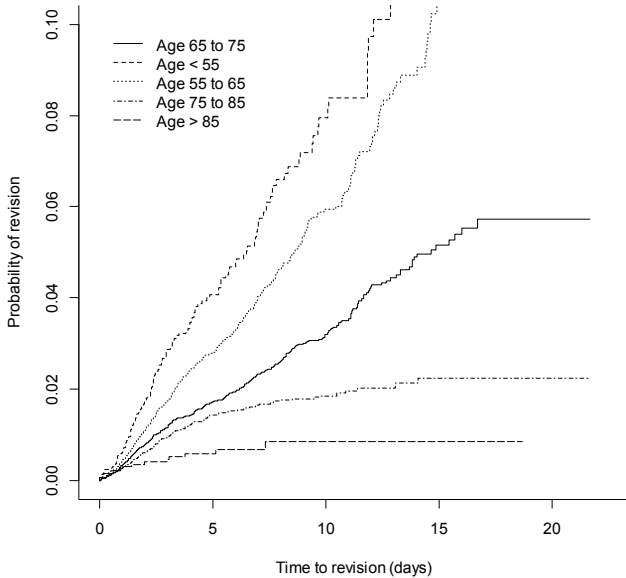



## REFERENCES

1. National Joint Registry for England and Wales: 9th Annual report. 2012.
2. Kurtz S, Mowat F, Ong K, Chan N, Lau E, Halpern M. Prevalence of primary and revision total hip and knee arthroplasty in the United States from 1990 through 2002. *The Journal of bone and joint surgery American volume*. 2005;87(7):1487-97. Epub 2005/07/05.
3. Sturmer T, Dreinhofer K, Grober-Gratz D, Brenner H, Dieppe P, Puhl W, et al. Differences in the views of orthopaedic surgeons and referring practitioners on the determinants of outcome after total hip replacement. *The Journal of bone and joint surgery British volume*. 2005;87(10):1416-9. Epub 2005/09/29.
4. Santaguida PL, Hawker GA, Hudak PL, Glazier R, Mahomed NN, Kreder HJ, et al. Patient characteristics affecting the prognosis of total hip and knee joint arthroplasty: a systematic review. *Canadian journal of surgery Journal canadien de chirurgie*. 2008;51(6):428-36. Epub 2008/12/06.
5. Commissioning Policy Statement: Referral and surgical threshold criteria for elective primary Hip Replacement Surgery. 2011.
6. Clinical threshold: hip replacement for the treatment of joint symptoms and functional limitation. 2011.
7. Commissioning decision: Hip and knee replacement surgery in obese patients (those with a body mass index of 30 or greater) Peninsula Commissioning Priorities Group, 2011.
8. Maradit Kremers H, Visscher SL, Moriarty JP, Reinalda MS, Kremers WK, Naessens JM, et al. Determinants of direct medical costs in primary and revision total knee arthroplasty. *Clinical orthopaedics and related research*. 2013;471(1):206-14. Epub 2012/08/07.
9. Vanhegan IS, Malik AK, Jayakumar P, Ul Islam S, Haddad FS. A financial analysis of revision hip arthroplasty: the economic burden in relation to the national tariff. *The Journal of bone and joint surgery British volume*. 2012;94(5):619-23. Epub 2012/04/25.
10. International Society of Arthroplasty Registers. Available from: <http://www.isarhome.org/directory>.
11. Serra-Sutton V, Allepuz A, Espallargues M, Labek G, Pons JM. Arthroplasty registers: a review of international experiences. *International journal of technology assessment in health care*. 2009;25(1):63-72. Epub 2009/01/08.
12. Kurtz SM, Ong KL, Lau E, Widmer M, Maravic M, Gomez-Barrena E, et al. International survey of primary and revision total knee replacement. *International orthopaedics*. 2011;35(12):1783-9. Epub 2011/03/16.
13. Jameson SS, Baker PN, Mason J, Porter ML, Deehan DJ, Reed MR. Independent predictors of revision following metal-on-metal hip resurfacing: a retrospective cohort study using National Joint Registry data. *The Journal of bone and joint surgery British volume*. 2012;94(6):746-54. Epub 2012/05/26.
14. Havelin LI, Robertsson O, Fenstad AM, Overgaard S, Garellick G, Furnes O. A Scandinavian experience of register collaboration: the Nordic Arthroplasty Register Association (NARA). *The Journal of bone and joint surgery American volume*. 2011;93 Suppl 3:13-9. Epub 2012/01/25.
15. Parkinson J, Davis S, TP vs. The General Practice Research (GPRD) Database: Now and the Future. In: Mann R, Andrews E, editors. *Pharmacovigilance*. 2nd ed. Chichester, West Sussex, England: John Wiley & Sons, Ltd.; 2007. p. 341-8.
16. Fine JP, Gray RJ. A proportional hazards model for the subdistribution of a competing risk. *J Am Stat Assoc*. 1999;94(446):496-509.
17. Berry SD, Ngo L, Samelson EJ, Kiel DP. Competing risk of death: an important consideration in studies of older adults. *Journal of the American Geriatrics Society*. 2010;58(4):783-7. Epub 2010/03/30.
18. Liu B, Balkwill A, Banks E, Cooper C, Green J, Beral V. Relationship of height, weight and body mass index to the risk of hip and knee replacements in middle-aged women. *Rheumatology (Oxford)*. 2007;46(5):861-7. Epub 2007/02/07.

19. Lubbeke A, Stern R, Garavaglia G, Zurcher L, Hoffmeyer P. Differences in outcomes of obese women and men undergoing primary total hip arthroplasty. *Arthritis and rheumatism*. 2007;57(2):327-34. Epub 2007/03/03.
20. AbdelSalam H, Restrepo C, Tarity TD, Sangster W, Parvizi J. Predictors of intensive care unit admission after total joint arthroplasty. *The Journal of arthroplasty*. 2012;27(5):720-5. Epub 2011/11/18.
21. Andrew JG, Palan J, Kurup HV, Gibson P, Murray DW, Beard DJ. Obesity in total hip replacement. *The Journal of bone and joint surgery British volume*. 2008;90(4):424-9. Epub 2008/04/02.
22. Lubbeke A, Katz JN, Perneger TV, Hoffmeyer P. Primary and revision hip arthroplasty: 5-year outcomes and influence of age and comorbidity. *The Journal of rheumatology*. 2007;34(2):394-400. Epub 2006/12/05.
23. Horan F. Obesity and joint replacement. *The Journal of bone and joint surgery British volume*. 2006;88(10):1269-71. Epub 2006/10/03.
24. Yeung E, Jackson M, Sexton S, Walter W, Zicat B. The effect of obesity on the outcome of hip and knee arthroplasty. *International orthopaedics*. 2011;35(6):929-34. Epub 2010/06/01.
25. McCalden RW, Charron KD, MacDonald SJ, Bourne RB, Naudie DD. Does morbid obesity affect the outcome of total hip replacement?: an analysis of 3290 THRs. *The Journal of bone and joint surgery British volume*. 2011;93(3):321-5. Epub 2011/03/02.
26. Fennema P, Lubsen J. Survival analysis in total joint replacement: an alternative method of accounting for the presence of competing risk. *The Journal of bone and joint surgery British volume*. 2010;92(5):701-6. Epub 2010/05/04.
27. Ranstam J, Karrholm J, Pulkkinen P, Makela K, Espehaug B, Pedersen AB, et al. Statistical analysis of arthroplasty data. II. Guidelines. *Acta orthopaedica*. 2011;82(3):258-67. Epub 2011/05/31.
28. Gillam MH, Ryan P, Graves SE, Miller LN, de Steiger RN, Salter A. Competing risks survival analysis applied to data from the Australian Orthopaedic Association National Joint Replacement Registry. *Acta orthopaedica*. 2010;81(5):548-55. Epub 2010/10/06.

STROBE Statement—Checklist of items that should be included in reports of *cohort studies*

|                              | Item No | Recommendation                                                                                                                                                                                                                                                                                                                                                                                                                                                    |
|------------------------------|---------|-------------------------------------------------------------------------------------------------------------------------------------------------------------------------------------------------------------------------------------------------------------------------------------------------------------------------------------------------------------------------------------------------------------------------------------------------------------------|
| <b>Title and abstract</b>    | 1       | (a) Indicate the study's design with a commonly used term in the title or the abstract<br><br><i>Population-based case cohort design (mentioned in Abstract/Method)</i><br><br>(b) Provide in the abstract an informative and balanced summary of what was done and what was found<br><br><i>Competing risks survival (mentioned in Abstract/Method)</i>                                                                                                          |
| <b>Introduction</b>          |         |                                                                                                                                                                                                                                                                                                                                                                                                                                                                   |
| Background/rationale         | 2       | Explain the scientific background and rationale for the investigation being reported<br><br><i>Age/gender available in National Joint Registry, but BMI has missing data. GPRD has good level of completeness for BMI.</i>                                                                                                                                                                                                                                        |
| Objectives                   | 3       | State specific objectives, including any prespecified hypotheses<br><br><i>To provide population-based estimates for the effects of BMI on time to revision, with long follow-up (mentioned in Introduction).</i>                                                                                                                                                                                                                                                 |
| <b>Methods</b>               |         |                                                                                                                                                                                                                                                                                                                                                                                                                                                                   |
| Study design                 | 4       | Present key elements of study design early in the paper<br><br><i>Method of Fine and Gray referred to (top of Analysis subsection in Methods section)</i>                                                                                                                                                                                                                                                                                                         |
| Setting                      | 5       | Describe the setting, locations, and relevant dates, including periods of recruitment, exposure, follow-up, and data collection<br><br><i>Fully described in Participants subsection in Methods section.</i>                                                                                                                                                                                                                                                      |
| Participants                 | 6       | (a) Give the eligibility criteria, and the sources and methods of selection of participants. Describe methods of follow-up<br><br><i>"all patients in the database with a diagnosis code for total hip or knee arthroplasty from the beginning of 1991 until August 2011", quoted in the Participants subsection in Methods section.</i><br><br>(b) For matched studies, give matching criteria and number of exposed and unexposed<br><br><i>Not applicable.</i> |
| Variables                    | 7       | Clearly define all outcomes, exposures, predictors, potential confounders, and effect modifiers. Give diagnostic criteria, if applicable<br><br><i>All defined in the Analysis subsection in Methods section: Outcome: time to first incidence of revision surgery, predictors: BMI, age, gender, potential confounders: smoking status, alcohol consumption, number of comorbid conditions.</i>                                                                  |
| Data sources/<br>measurement | 8*      | For each variable of interest, give sources of data and details of methods of assessment (measurement). Describe comparability of assessment methods if there is more than one group<br><br><i>In the Analysis subsection in Methods section. Single group comprising those undergoing total replacement of the hip/knee (no controls).</i>                                                                                                                       |
| Bias                         | 9       | Describe any efforts to address potential sources of bias<br><br><i>In the Analysis subsection in Methods section. Comorbid conditions are a possible source of bias, hence the adjustment.</i>                                                                                                                                                                                                                                                                   |
| Study size                   | 10      | Explain how the study size was arrived at<br><br><i>Population-based study. The GPRD is sized to enable precise estimates for most geographic/demographic subgroups.</i>                                                                                                                                                                                                                                                                                          |
| Quantitative variables       | 11      | Explain how quantitative variables were handled in the analyses. If applicable, describe which groupings were chosen and why<br><br><i>BMI was grouped according to WHO guidelines.</i>                                                                                                                                                                                                                                                                           |

|    |                     |    |                                                                                                                                                   |
|----|---------------------|----|---------------------------------------------------------------------------------------------------------------------------------------------------|
| 1  | Statistical methods | 12 | (a) Describe all statistical methods, including those used to control for confounding<br><i>Done (in Analysis subsection in Methods section).</i> |
| 2  |                     |    |                                                                                                                                                   |
| 3  |                     |    |                                                                                                                                                   |
| 4  |                     |    | (b) Describe any methods used to examine subgroups and interactions                                                                               |
| 5  |                     |    | <i>Two-way interactions examined (described in Analysis subsection in Methods</i>                                                                 |
| 6  |                     |    | <i>section)</i>                                                                                                                                   |
| 7  |                     |    | (c) Explain how missing data were addressed                                                                                                       |
| 8  |                     |    | <i>Presence of BMI (in table 1) was sufficiently complete (&gt;80% knees; &gt;85% hips) and</i>                                                   |
| 9  |                     |    | <i>age and gender were 100% complete.</i>                                                                                                         |
| 10 |                     |    |                                                                                                                                                   |
| 11 |                     |    | (d) If applicable, explain how loss to follow-up was addressed                                                                                    |
| 12 |                     |    | <i>Not applicable in such a dataset (most patients remained registered with the same GP</i>                                                       |
| 13 |                     |    | <i>in the GPRD, those leaving are not traceable).</i>                                                                                             |
| 14 |                     |    |                                                                                                                                                   |
| 15 |                     |    | (e) Describe any sensitivity analyses                                                                                                             |
| 16 |                     |    | <i>Cox regression used as a sensitivity vs. Competing Risks Regression (described in</i>                                                          |
| 17 |                     |    | <i>Analysis subsection in Methods section).</i>                                                                                                   |

## Results

|    |                  |     |                                                                                           |
|----|------------------|-----|-------------------------------------------------------------------------------------------|
| 18 | <b>Results</b>   |     |                                                                                           |
| 19 |                  |     |                                                                                           |
| 20 | Participants     | 13* | (a) Report numbers of individuals at each stage of study—eg numbers potentially           |
| 21 |                  |     | eligible, examined for eligibility, confirmed eligible, included in the study,            |
| 22 |                  |     | completing follow-up, and analysed                                                        |
| 23 |                  |     | <i>Numbers given in table 1.</i>                                                          |
| 24 |                  |     |                                                                                           |
| 25 |                  |     | (b) Give reasons for non-participation at each stage                                      |
| 26 |                  |     | <i>Not applicable (population-based data)</i>                                             |
| 27 |                  |     |                                                                                           |
| 28 |                  |     | (c) Consider use of a flow diagram                                                        |
| 29 | Descriptive data | 14* | (a) Give characteristics of study participants (eg demographic, clinical, social) and     |
| 30 |                  |     | information on exposures and potential confounders                                        |
| 31 |                  |     | <i>Characteristics given in table 1.</i>                                                  |
| 32 |                  |     |                                                                                           |
| 33 |                  |     | (b) Indicate number of participants with missing data for each variable of interest       |
| 34 |                  |     | <i>Given for BMI (the only variable of interest with missingness)</i>                     |
| 35 |                  |     |                                                                                           |
| 36 |                  |     | (c) Summarise follow-up time (eg, average and total amount)                               |
| 37 | Outcome data     | 15* | Report numbers of outcome events or summary measures over time                            |
| 38 |                  |     | <i>Number of revisions reported in table 1.</i>                                           |
| 39 | Main results     | 16  | (a) Give unadjusted estimates and, if applicable, confounder-adjusted estimates and       |
| 40 |                  |     | their precision (eg, 95% confidence interval). Make clear which confounders were          |
| 41 |                  |     | adjusted for and why they were included                                                   |
| 42 |                  |     | <i>Provided in tables 2, 3 and 4</i>                                                      |
| 43 |                  |     |                                                                                           |
| 44 |                  |     | (b) Report category boundaries when continuous variables were categorized                 |
| 45 |                  |     | <i>Done (Results section; subsection entitled Survival Analysis)</i>                      |
| 46 |                  |     |                                                                                           |
| 47 |                  |     | (c) If relevant, consider translating estimates of relative risk into absolute risk for a |
| 48 |                  |     | meaningful time period                                                                    |
| 49 |                  |     | <i>Not appropriate for this data, although we have provided estimates of numbers</i>      |
| 50 |                  |     | <i>needed to “treat” (NNT).</i>                                                           |
| 51 | Other analyses   | 17  | Report other analyses done—eg analyses of subgroups and interactions, and                 |
| 52 |                  |     | sensitivity analyses                                                                      |
| 53 |                  |     | <i>Done (Piecewise analysis and Cox regression – both documented in Results section;</i>  |
| 54 |                  |     | <i>subsection entitled Survival Analysis)</i>                                             |

## Discussion

|    |                   |    |                                                                                    |
|----|-------------------|----|------------------------------------------------------------------------------------|
| 55 | <b>Discussion</b> |    |                                                                                    |
| 56 | Key results       | 18 | Summarise key results with reference to study objectives                           |
| 57 |                   |    | <i>Described in first few paragraphs of discussion.</i>                            |
| 58 |                   |    |                                                                                    |
| 59 | Limitations       | 19 | Discuss limitations of the study, taking into account sources of potential bias or |
| 60 |                   |    | imprecision. Discuss both direction and magnitude of any potential bias            |

|                          |    |                                                                                                                                                                                                                                                                                         |
|--------------------------|----|-----------------------------------------------------------------------------------------------------------------------------------------------------------------------------------------------------------------------------------------------------------------------------------------|
|                          |    | Limitations covered in penultimate paragraph of discussion (e.g. lack of reliable indication data, long follow-up but includes older prostheses).                                                                                                                                       |
| Interpretation           | 20 | Give a cautious overall interpretation of results considering objectives, limitations, multiplicity of analyses, results from similar studies, and other relevant evidence<br>Covered in the middle part of the discussion section.                                                     |
| Generalisability         | 21 | Discuss the generalisability (external validity) of the study results<br>Population-based study so results are generalisable to the (gender-specific) UK adult population as a whole. Stated in 'Strengths and Limitations' subsection of Discussion section.                           |
| <b>Other information</b> |    |                                                                                                                                                                                                                                                                                         |
| Funding                  | 22 | Give the source of funding and the role of the funders for the present study and, if applicable, for the original study on which the present article is based<br>NIHR Programme Grant for Applied Research grant number given in relevant section immediately following the discussion. |

\*Give information separately for exposed and unexposed groups.

**Note:** An Explanation and Elaboration article discusses each checklist item and gives methodological background and published examples of transparent reporting. The STROBE checklist is best used in conjunction with this article (freely available on the Web sites of PLoS Medicine at <http://www.plosmedicine.org/>, Annals of Internal Medicine at <http://www.annals.org/>, and Epidemiology at <http://www.epidem.com/>). Information on the STROBE Initiative is available at <http://www.strobe-statement.org>.
